# Supplementary material
Source: Research Square preprint supplement (doi:10.21203/rs.3.rs-9455636/v1)
Supplement: Supplementary file 1 [file b152d6d0cc47e3eadcf6c224.xlsx]

## Sheet: Readme
Readme — supplementary raw materials
Item	Description
Purpose	This workbook provides the supplementary raw materials and analytical outputs supporting the manuscript entitled “Decoding the spatial coupling of heritage irrigation structures and rural human settlements: a subjective–objective integrated approach”. The materials are provided for double-blind peer review and are intended to support the verification of the dataset, indicator calculation, weighti…
Structure of this workbook	This workbook contains village-level datasets, standardised indicators, raw objective indicators, anonymised questionnaire data, aggregated survey data, indicator weighting procedures, coupling coordination degree results, spatial autocorrelation results, regression results, K-means clustering outputs, data dictionary, questionnaire codebook, anonymisation notes, and restricted data explanations.
Village-level data	The village-level dataset includes 89 administrative villages used as the basic spatial units of analysis. The data support the calculation of the irrigation heritage value realisation index, rural human settlement quality index, and coupling coordination degree.
Standardised indicators	The standardised indicator sheet provides the direction-adjusted indicator values used in the evaluation model. For all standardised indicators, higher values indicate better performance in the corresponding subsystem after standardisation.
Questionnaire data	The questionnaire data have been anonymised before analysis and sharing. Directly identifiable personal information, such as names, phone numbers, precise addresses, and other personal identifiers, is not included in this workbook.
Weighting procedures	The AHP, entropy, and combined weighting sheets provide the calculation procedures used to derive the final indicator weights. These sheets include the weighting results and intermediate values necessary to verify the weighting process.
Analytical outputs	The workbook includes coupling coordination degree results, kriging validation results, global and local spatial autocorrelation results, regression outputs, silhouette coefficient results, and K-means village type classification results.
Data dictionary and codebook	The data dictionary explains the meaning, subsystem, criterion layer, data source, indicator direction, and standardisation method of each indicator. The questionnaire codebook explains the questionnaire items, response scales, coding rules, and aggregation methods.
Anonymisation	All files have been prepared for double-blind peer review. Author names, affiliations, funding information, institutional identifiers, respondent names, and other identifying information have been removed or redacted where necessary.
Restricted source data	Some original spatial source data, including irrigation engineering maps and administrative spatial data provided by local management authorities, are subject to third-party restrictions and may contain potentially sensitive local information. These original files are not shared in full. Instead, processed village-level indicators, calculation procedures, and analytical outputs necessary to verif…
Use of the materials	These supplementary materials are provided to editors and reviewers for peer review purposes. They should be read together with the revised manuscript and the Data Availability Statement.

## Sheet: Supplementary_inventory
Supplementary material inventory
This sheet identifies each supplementary material component, its purpose in the manuscript, anonymisation status, and sharing status for double-blind peer review.
File name / material	Sheet or section	Content	Purpose in the manuscript	Data type	Anonymised? Yes/No	Shared status	Notes
Supplementary_Raw_Materials_DBPR.xlsx	Readme	Overview of the supplementary workbook, file structure, and instructions for reviewers	Helps editors and reviewers understand the organisation and use of the supplementary materials	Documentation / README	Yes	Included in this workbook	No author-identifying information is included.
Supplementary_Raw_Materials_DBPR.xlsx	Supplementary_inventory	Inventory of supplementary material components, sheet purposes, anonymisation status, and sharing status	Allows editors and reviewers to locate each dataset, calculation sheet, documentation component, and restricted-data explanation	Documentation / inventory	Yes	Included in this workbook	The inventory provides a complete index of the workbook contents and externally uploaded survey documentation.
Supplementary_Raw_Materials_DBPR.xlsx	Data_dictionary	Data dictionary and variable definitions, including target layer, criterion layer, attribute type, unit, data source, direction, standardisation method, and coding notes	Explains the meaning and derivation of each indicator used in the evaluation framework	Documentation / data dictionary	Yes	Included in this workbook	Variable definitions and standardisation directions are consistent with the manuscript.
Supplementary_Raw_Materials_DBPR.xlsx	Questionnaire_codebook	Coding scheme for the anonymised household questionnaire, including response scales, coding rules, aggregation methods, corresponding indicators, and missing-value treatment	Explains how questionnaire responses were coded, anonymised, and aggregated for subjective indicator construction	Documentation / questionnaire codebook	Yes	Included in this workbook	Questionnaire items are linked to the corresponding standardised variables where applicable.
Supplementary_Raw_Materials_DBPR.xlsx	Anonymisation_notes	Description of how respondent identifiers, author-identifying information, institutional identifiers, and file metadata were removed or redacted	Documents anonymisation procedures for double-blind peer review and personal data protection	Documentation / anonymisation record	Yes	Included in this workbook	The sheet confirms that direct personal identifiers and author-identifying details are not included in the anonymised supplementary files.
Supplementary_Raw_Materials_DBPR.xlsx	Restricted_data_explanation	Explanation of original materials not shared in full, reasons for restriction, and processed alternatives provided for verification	Clarifies why certain third-party or potentially sensitive original source files are not redistributed in full	Documentation / restricted data explanation	Yes	Included in this workbook	Processed village-level indicators and analytical outputs are provided as alternatives for verification.
Supplementary_Raw_Materials_DBPR.xlsx	Village_level_dataset	Village-level evaluation dataset for the 89 administrative villages, including key identifiers and calculated index-related variables	Provides the basic village-level dataset used for index calculation, comparison, and subsequent spatial/statistical analysis	Processed dataset	Yes	Included in this workbook	Only village-level information is retained. No respondent-level identifiers are included.
Supplementary_Raw_Materials_DBPR.xlsx	Standardised_indicators	Standardised indicator values used to calculate the irrigation heritage value realisation index, rural human settlement quality index, and coupling coordination degree	Supports reproduction of the composite index calculation and CCD analysis	Processed dataset / standardised matrix	Yes	Included in this workbook	Positive/negative standardisation directions are consistent with the manuscript.
Supplementary_Raw_Materials_DBPR.xlsx	Raw_objective_indicators	Raw objective indicator values derived from spatial analysis and other objective data sources before standardisation	Allows reviewers to trace the transformation from raw objective variables to standardised indicators	Raw/processed objective dataset	Yes	Included in this workbook	Original restricted spatial source files are not included; processed village-level indicators are provided instead.
Supplementary_Raw_Materials_DBPR.xlsx	Aggregated_survey_data	Sample-village-level aggregated survey results derived from the household questionnaire data	Provides aggregated subjective data for sampled villages used for interpolation and village-level indicator construction	Aggregated survey dataset	Yes	Included in this workbook	Survey responses are aggregated to the sampled-village level to protect respondent privacy and support subsequent spatial interpolation.
Supplementary_Raw_Materials_DBPR.xlsx	Anonymised_questionnaire	Anonymised household questionnaire dataset with directly identifiable personal information removed	Supports the calculation and verification of subjective indicators derived from household surveys	Anonymised raw survey data	Yes	Included in this workbook	Names, phone numbers, detailed addresses, ID numbers, and other direct identifiers have been removed.
Supplementary_Raw_Materials_DBPR.xlsx	AHP_weights	AHP subjective weighting results, including judgement matrices, priority vectors, and consistency test information where applicable	Documents the subjective weighting procedure used in the composite evaluation framework	Calculation file	Yes	Included in this workbook	AHP weights are consistent with the manuscript and final combined-weight table.
Supplementary_Raw_Materials_DBPR.xlsx	Entropy_weights	Entropy-method objective weighting results, including entropy values, divergence coefficients, and entropy weights	Documents the objective weighting procedure and allows reviewers to verify entropy-weight calculation	Calculation file	Yes	Included in this workbook	Entropy_value_e and Divergence_coefficient_d are provided for each indicator.
Supplementary_Raw_Materials_DBPR.xlsx	Combined_weights	Integrated weights obtained by combining AHP weights and entropy weights	Provides the final indicator weights used in index calculation and CCD analysis	Calculation file / final weights	Yes	Included in this workbook	The combination formula is consistent with the Methods section.
Supplementary_Raw_Materials_DBPR.xlsx	CCD_results	Coupling coordination degree calculation results for the 89 administrative villages	Provides the main evaluation output used to analyse the coupling relationship between IHVR and RHSQ	Analytical output	Yes	Included in this workbook	Values are consistent with those reported in the manuscript and figures.
Supplementary_Raw_Materials_DBPR.xlsx	Kriging_validation	Validation results for Kriging interpolation or spatial estimation procedures, where applicable	Supports the reliability check for interpolated or estimated spatial variables	Validation output	Yes	Included in this workbook	Relevant variables and validation statistics are provided in this sheet.
Supplementary_Raw_Materials_DBPR.xlsx	Global_Moran_summary	Global Moran’s I summary results for relevant variables or indices	Supports the assessment of overall spatial autocorrelation patterns	Spatial statistical output	Yes	Included in this workbook	Moran’s I, z-score, p-value, and interpretation are provided where applicable.
Supplementary_Raw_Materials_DBPR.xlsx	Moran_LISA_results	Local Moran’s I / LISA results and spatial cluster categories for village-level units	Supports the identification of local spatial clusters and outliers	Spatial statistical output	Yes	Included in this workbook	Village ID, index value, local statistic, p-value, and cluster type are provided where applicable.
Supplementary_Raw_Materials_DBPR.xlsx	Regression_results	Regression model outputs used to examine relationships between explanatory variables and evaluation/coupling results	Supports the interpretation of influencing factors and spatial mechanisms	Statistical output	Yes	Included in this workbook	Model specification, coefficients, standard errors, p-values, and diagnostic information are provided where applicable.
Supplementary_Raw_Materials_DBPR.xlsx	Kmeans_silhouette	Silhouette coefficient results for alternative K-means clustering solutions	Justifies the selection of the final number of clusters for village typology identification	Clustering validation output	Yes	Included in this workbook	Tested k values and average silhouette coefficients are provided.
Supplementary_Raw_Materials_DBPR.xlsx	Kmeans_village_types	Final K-means clustering results and village type classification	Provides the village typology used to support differentiated governance or optimisation strategies	Clustering output / analytical result	Yes	Included in this workbook	Cluster labels and typology names are consistent with the manuscript.
Supplementary_Survey_Instruments_and_Protocols_DBPR.pdf	N/A	Household questionnaire, informed-consent information, survey protocol, data anonymisation procedure, and data collection procedures	Documents the survey instrument and survey protocol requested by the editorial office	Survey documentation	Yes	Uploaded as separate supplementary file	The file is anonymised for double-blind peer review and contains no author- or respondent-identifying information.
Restricted original spatial source data	Original irrigation engineering maps and administrative spatial source files	Original spatial source materials provided by local management authorities	Original source materials underpinning the derivation of some spatial indicators	Restricted third-party source data	N/A	Restricted; not shared in full	These files cannot be publicly shared in full due to third-party restrictions and potentially sensitive local information. Processed village-level indicators and analytical outputs are provided instead.

## Sheet: Data_dictionary
Data dictionary / variable definitions
Positive/negative direction refers to the original indicator before standardisation. Objective indicators without questionnaire items are marked as N/A. All standardised indicators are direction-adjusted; higher values indicate stronger irrigation heritage value realisation or better rural human settlement quality.
Variable name	Indicator name	Standardised variable name	Target layer	Criterion layer	Indicator attribute	Unit / scale	Data source	Original questionnaire item / source reference	Positive/negative direction	Standardisation method	Quantification / coding method	Description / coding notes
X1	Main canal density	Main_canal_density_std	Irrigation heritage value realisation level (IHVR, U1)	Structural integrity	Objective	km/km²	Irrigation engineering maps and canal vector data provided by local management authorities, processed in GIS	N/A	Positive	Positive min–max standardisation	Ratio of the total length of main canals to the study area, used to characterise the spatial carrying capacity of the primary irrigation infrastructure.	Objective indicator derived from spatial, remote sensing, land-use, POI, or statistical data; higher values indicate better performance after direction adjustment.
X2	Branch canal density	Branch_canal_density_std	Irrigation heritage value realisation level (IHVR, U1)	Structural integrity	Objective	km/km²	Irrigation engineering maps and canal vector data provided by local management authorities, processed in GIS	N/A	Positive	Positive min–max standardisation	Ratio of the total length of branch canals to the study area, reflecting the degree of refinement in the hierarchical structure of the canal system.	Objective indicator derived from spatial, remote sensing, land-use, POI, or statistical data; higher values indicate better performance after direction adjustment.
X3	Canal network connectivity	Canal_network_connectivity_std	Irrigation heritage value realisation level (IHVR, U1)	Structural integrity	Objective	Index	Irrigation engineering maps and canal vector data provided by local management authorities, processed in GIS	N/A	Positive	Positive min–max standardisation	Canal networks are constructed based on graph theory, and a network connectivity index is calculated to measure the overall connectivity level of the irrigation system.	Objective indicator derived from spatial, remote sensing, land-use, POI, or statistical data; higher values indicate better performance after direction adjustment.
X4	Spatial agglomeration index of existing heritage elements	Heritage_element_agglomeration_std	Irrigation heritage value realisation level (IHVR, U1)	Structural integrity	Objective	Index	Public data sources, field surveys, and GIS-based spatial interpretation	N/A	Positive	Positive min–max standardisation	Spatial agglomeration intensity of irrigation heritage elements is measured based on the kernel density estimation method.	Objective indicator derived from spatial, remote sensing, land-use, POI, or statistical data; higher values indicate better performance after direction adjustment.
X5	Diversity of heritage elements	Heritage_element_diversity_std	Irrigation heritage value realisation level (IHVR, U1)	Structural integrity	Objective	Index	Public data sources, field surveys, and GIS-based spatial interpretation	N/A	Positive	Positive min–max standardisation	The Shannon diversity index is used to measure the diversity level of irrigation heritage types, such as sluices, bridges, canals, and ponds.	Objective indicator derived from spatial, remote sensing, land-use, POI, or statistical data; higher values indicate better performance after direction adjustment.
X6	Proportion of irrigated area	Irrigated_area_proportion_std	Irrigation heritage value realisation level (IHVR, U1)	Functional continuity	Objective	%	Effective irrigated land data derived from remote sensing image interpretation	N/A	Positive	Positive min–max standardisation	Proportion of effectively irrigated area to the total study area, used to characterise the actual continuity of irrigation functions.	Objective indicator derived from spatial, remote sensing, land-use, POI, or statistical data; higher values indicate better performance after direction adjustment.
X7	Operational status of irrigation services	Operational_status_irrigation_services_std	Irrigation heritage value realisation level (IHVR, U1)	Functional continuity	Subjective	Likert-derived index	Questionnaire survey data	Q7	Positive	Village-level aggregation and positive min–max standardisation	Mean score of 5-point Likert-scale responses evaluating whether irrigation services operate well, with stable water supply and timely delivery.	Subjective indicator derived from questionnaire or Likert-scale composite assessment; higher values indicate better performance after village-level aggregation and direction adjustment.
X8	Navigational functionality	Navigational_functionality_std	Irrigation heritage value realisation level (IHVR, U1)	Functional continuity	Subjective	Likert-derived index	Questionnaire survey data	Q8	Positive	Village-level aggregation and positive min–max standardisation	Mean score of 5-point Likert-scale responses evaluating the navigation function of channels other than the Grand Canal/Liyun River and Gaoyou Lake.	Subjective indicator derived from questionnaire or Likert-scale composite assessment; higher values indicate better performance after village-level aggregation and direction adjustment.
X9	Flood mitigation capacity	Flood_mitigation_capacity_std	Irrigation heritage value realisation level (IHVR, U1)	Functional continuity	Subjective	Likert-derived index	Questionnaire survey data	Q9	Positive	Village-level aggregation and positive min–max standardisation	Mean score of 5-point Likert-scale responses evaluating the effectiveness of flood control and drainage functions.	Subjective indicator derived from questionnaire or Likert-scale composite assessment; higher values indicate better performance after village-level aggregation and direction adjustment.
X10	Management and maintenance status	Management_maintenance_status_std	Irrigation heritage value realisation level (IHVR, U1)	Functional continuity	Subjective	Likert-derived index	Questionnaire survey data	Q10	Positive	Village-level aggregation and positive min–max standardisation	Mean score of 5-point Likert-scale responses evaluating the maintenance of sluice stations and channels, including dredging, repairs, inspection frequency, and maintenance response.	Subjective indicator derived from questionnaire or Likert-scale composite assessment; higher values indicate better performance after village-level aggregation and direction adjustment.
X11	Governance and participation level	Governance_participation_std	Irrigation heritage value realisation level (IHVR, U1)	Socio-cultural effects	Subjective	Likert-derived index	Questionnaire survey data	Q11	Positive	Village-level aggregation and positive min–max standardisation	Mean score of 5-point Likert-scale responses evaluating residents’ participation in maintenance, protection, promotion, or management related to the irrigation heritage.	Subjective indicator derived from questionnaire or Likert-scale composite assessment; higher values indicate better performance after village-level aggregation and direction adjustment.
X12	Heritage awareness	Heritage_awareness_std	Irrigation heritage value realisation level (IHVR, U1)	Socio-cultural effects	Subjective	Likert-derived index	Questionnaire survey data	Q12	Positive	Village-level aggregation and positive min–max standardisation	Mean score of 5-point Likert-scale responses evaluating residents’ awareness of the origins, historical and cultural stories, heritage knowledge, and traditional technical wisdom of the irrigation heritage.	Subjective indicator derived from questionnaire or Likert-scale composite assessment; higher values indicate better performance after village-level aggregation and direction adjustment.
X13	Sense of heritage identity	Heritage_identity_std	Irrigation heritage value realisation level (IHVR, U1)	Socio-cultural effects	Subjective	Likert-derived index	Questionnaire survey data	Q13–Q14	Positive	Village-level aggregation and positive min–max standardisation	Composite or mean score derived from residents’ perceived importance of the irrigation heritage and their support for public investment in its protection, maintenance, and promotion.	Subjective indicator derived from questionnaire or Likert-scale composite assessment; higher values indicate better performance after village-level aggregation and direction adjustment.
X14	Heritage engagement and cultural transmission	Heritage_engagement_transmission_std	Irrigation heritage value realisation level (IHVR, U1)	Socio-cultural effects	Subjective	Likert-derived index	Questionnaire survey data	Q15	Positive	Village-level aggregation and positive min–max standardisation	Mean score of 5-point Likert-scale responses evaluating participation in cultural activities related to the Liyun River–Gaoyou Irrigation District, such as festivals, traditional customs, sightseeing, and study tours.	Subjective indicator derived from questionnaire or Likert-scale composite assessment; higher values indicate better performance after village-level aggregation and direction adjustment.
Y1	Proportion of farmland	Farmland_proportion_std	Rural human settlement quality level (RHSQ, U2)	Level of production development	Objective	%	Current land-use data	N/A	Positive	Positive min–max standardisation	Proportion of agricultural land area to the total village area, used to characterise the agricultural production foundation of each village.	Objective indicator derived from spatial, remote sensing, land-use, POI, or statistical data; higher values indicate better performance after direction adjustment.
Y2	Economic vitality index (nighttime light proxy)	Nighttime_light_proxy_std	Rural human settlement quality level (RHSQ, U2)	Level of production development	Objective	Index	Nighttime light remote sensing data	N/A	Positive	Positive min–max standardisation	Nighttime light intensity is used as a proxy for the level of economic activity in each village.	Objective indicator derived from spatial, remote sensing, land-use, POI, or statistical data; higher values indicate better performance after direction adjustment.
Y3	Rural economic diversity	Rural_economic_diversity_std	Rural human settlement quality level (RHSQ, U2)	Level of production development	Objective	Index	Land-use data provided by local management authorities	N/A	Positive	Positive min–max standardisation	The Shannon diversity index is used to measure the diversification level of land-use or economic activity structure, reflecting the richness and balance of production-related spaces within the rural development system.	Objective indicator derived from spatial, remote sensing, land-use, POI, or statistical data; higher values indicate better performance after direction adjustment.
Y4	Diversity of villagers’ livelihood sources	Livelihood_diversity_std	Rural human settlement quality level (RHSQ, U2)	Level of production development	Subjective	Likert- or survey-derived index	Questionnaire survey data	Q5–Q6	Positive	Village-level aggregation and positive min–max standardisation	Composite indicator derived from respondents’ reported main income sources and approximate annual income, used to reflect the diversification of livelihood sources and production-related household conditions.	Subjective indicator derived from questionnaire or Likert-scale composite assessment; higher values indicate better performance after village-level aggregation and direction adjustment.
Y5	Village density	Village_density_std	Rural human settlement quality level (RHSQ, U2)	Level of living development	Objective	% or km²/km²	Land-use data provided by local management authorities	N/A	Positive	Positive min–max standardisation	Proportion of residential land area to the total village area at the administrative village scale, used to characterise the spatial distribution intensity and compactness of rural residential areas.	Objective indicator derived from spatial, remote sensing, land-use, POI, or statistical data; higher values indicate better performance after direction adjustment.
Y6	Road density	Road_density_std	Rural human settlement quality level (RHSQ, U2)	Level of living development	Objective	km/km²	Road spatial vector data	N/A	Positive	Positive min–max standardisation	Ratio of total road length to the study area, used to measure transportation accessibility and road network development.	Objective indicator derived from spatial, remote sensing, land-use, POI, or statistical data; higher values indicate better performance after direction adjustment.
Y7	Population density	Population_density_std	Rural human settlement quality level (RHSQ, U2)	Level of living development	Objective	persons/km²	Gridded population distribution data	N/A	Positive	Positive min–max standardisation	Population within the village area is estimated based on gridded population data, and population density per unit area is calculated to characterise the spatial distribution intensity of the rural population.	Objective indicator derived from spatial, remote sensing, land-use, POI, or statistical data; higher values indicate better performance after direction adjustment.
Y8	Public service proximity	Public_service_proximity_std	Rural human settlement quality level (RHSQ, U2)	Level of living development	Objective	Index	Public map-service POI data	N/A	Positive	Positive min–max standardisation	Public service proximity is calculated from the distance between village centroids and public service POIs after direction adjustment, so that higher values indicate better access to services.	Objective indicator derived from spatial, remote sensing, land-use, POI, or statistical data; higher values indicate better performance after direction adjustment.
Y9	Place attachment and cultural identity	Place_attachment_cultural_identity_std	Rural human settlement quality level (RHSQ, U2)	Level of living development	Subjective	Likert-derived index	Questionnaire survey data	Q17	Positive	Village-level aggregation and positive min–max standardisation	Mean score of 5-point Likert-scale responses evaluating whether residents like the village where they currently live, used to reflect place attachment and local identity.	Subjective indicator derived from questionnaire or Likert-scale composite assessment; higher values indicate better performance after village-level aggregation and direction adjustment.
Y10	Community governance satisfaction	Community_governance_satisfaction_std	Rural human settlement quality level (RHSQ, U2)	Level of living development	Subjective	Likert-derived index	Questionnaire survey data	Q18	Positive	Village-level aggregation and positive min–max standardisation	Mean score of 5-point Likert-scale responses evaluating residents’ satisfaction with current village management and public governance.	Subjective indicator derived from questionnaire or Likert-scale composite assessment; higher values indicate better performance after village-level aggregation and direction adjustment.
Y11	NDVI	NDVI_std	Rural human settlement quality level (RHSQ, U2)	Ecological level	Objective	Index	Remote sensing imagery data	N/A	Positive	Positive min–max standardisation	Mean value of the regional vegetation coverage index, used to reflect the baseline ecological condition.	Objective indicator derived from spatial, remote sensing, land-use, POI, or statistical data; higher values indicate better performance after direction adjustment.
Y12	Water system connectivity	Water_system_connectivity_std	Rural human settlement quality level (RHSQ, U2)	Ecological level	Objective	Index	Irrigation engineering maps, water system vector data, and natural river data provided by local management authorities and processed in GIS	N/A	Positive	Positive min–max standardisation	A water system network composed of natural rivers and artificial canals is constructed based on graph theory, and the overall connectivity of the regional composite water system is characterised by calculating a network connectivity index.	Objective indicator derived from spatial, remote sensing, land-use, POI, or statistical data; higher values indicate better performance after direction adjustment.
Y13	Water area density	Water_area_density_std	Rural human settlement quality level (RHSQ, U2)	Ecological level	Objective	% or km²/km²	Remote sensing-interpreted water system data	N/A	Positive	Positive min–max standardisation	Proportion of water area to the total village area, used to characterise the abundance of water surfaces within the village.	Objective indicator derived from spatial, remote sensing, land-use, POI, or statistical data; higher values indicate better performance after direction adjustment.
Y14	Landscape diversity	Landscape_diversity_std	Rural human settlement quality level (RHSQ, U2)	Ecological level	Objective	Index	Land-use data provided by local management authorities	N/A	Positive	Positive min–max standardisation	Based on the proportions of different land-use types at the administrative village scale, the Shannon Diversity Index (SHDI) is used to characterise the richness and evenness of the village land-use structure.	Objective indicator derived from spatial, remote sensing, land-use, POI, or statistical data; higher values indicate better performance after direction adjustment.
Y15	Proportion of ecological land	Ecological_land_proportion_std	Rural human settlement quality level (RHSQ, U2)	Ecological level	Objective	%	Land-use data provided by local management authorities	N/A	Positive	Positive min–max standardisation	Proportion of ecological land, including forest, grassland, and water areas, within the village to the total village area, used to reflect the share of ecological space and the foundation for ecological conservation.	Objective indicator derived from spatial, remote sensing, land-use, POI, or statistical data; higher values indicate better performance after direction adjustment.
Y16	Perception of the ecological environment	Ecological_environment_perception_std	Rural human settlement quality level (RHSQ, U2)	Ecological level	Subjective	Likert-derived index	Questionnaire survey data	Q19	Positive	Village-level aggregation and positive min–max standardisation	Mean score of 5-point Likert-scale responses evaluating residents’ perception of water, green space, air quality, comfort, cleanliness, and the influence of ecological conditions on daily life and production.	Subjective indicator derived from questionnaire or Likert-scale composite assessment; higher values indicate better performance after village-level aggregation and direction adjustment.
SV1	Perceived village economic development	Village_economic_development_std	Rural human settlement quality level (RHSQ, U2)	Level of production development	Subjective	Likert-derived index	Questionnaire survey data	Q16	Positive	Village-level aggregation and positive min–max standardisation	Mean score of 5-point ordered evaluation-scale responses evaluating the overall economic development of the village.	Supporting subjective indicator reflecting residents’ perception of village economic development; used to support interpretation and validation of the production-development dimension. Higher values indicate better perceived economic development after village-level aggregation and direction adjustment.

## Sheet: Questionnaire_codebook
Questionnaire_codebook
Coding scheme for the anonymised household questionnaire used in this study. All questionnaire data were anonymised before analysis. Village-level aggregation was used for index calculation where applicable. All coded perception/evaluation items follow a positive direction unless otherwise stated: higher scores indicate better, stronger, or more favourable responses.
Variable name	Questionnaire item	Response scale	Coding rule	Aggregation method	Corresponding indicator / role in analysis	Standardised variable(s)	Missing-value treatment	Notes
Q1_Gender	Gender / 您的性别	Single choice	1 = Male / 男; 2 = Female / 女	Not aggregated for index calculation; summarised only for sample description if needed	Demographic background variable; not directly used in IHVR, RHSQ, or CCD calculation	N/A	Blank or invalid responses coded as missing and excluded from descriptive statistics	No directly identifiable personal information was collected.
Q2_Age	Age / 您的年龄	Ordinal single choice	1 = Under 18 / 18岁以下; 2 = 18–35 / 18–35岁; 3 = 36–50 / 36–50岁; 4 = 51–65 / 51–65岁; 5 = Over 65 / 65岁以上	Not aggregated for index calculation; summarised only for sample description if needed	Demographic background variable; not directly used in IHVR, RHSQ, or CCD calculation	N/A	Blank or invalid responses coded as missing and excluded from descriptive statistics	Age was recorded by category only.
Q3_Residence_length	Length of Residence / 您在本地连续居住时间	Ordinal single choice	1 = ≤ 5 years / 5年及以下; 2 = 6–10 years / 6–10年; 3 = 11–20 years / 11–20年; 4 = > 20 years / 20年以上	Not aggregated for index calculation; summarised only for sample description if needed	Demographic/background variable used to describe respondents’ local experience	N/A	Blank or invalid responses coded as missing and excluded from descriptive statistics	Residence duration was recorded by category only.
Q4_Education	Education / 您的最高教育程度	Ordinal single choice	1 = Primary school or below / 小学及以下; 2 = Junior high school / 初中; 3 = Vocational school / 中专; 4 = Senior high school / 高中; 5 = Junior college / 大专; 6 = Bachelor’s degree / 本科; 7 = Master’s degree or above / 硕士及以上	Not aggregated for index calculation; summarised only for sample description if needed	Demographic/background variable	N/A	Blank or invalid responses coded as missing and excluded from descriptive statistics	Education was recorded by category.
Q5_Income_sources	Main Sources of Personal Income / 您个人的主要收入来源	Multiple choice	Each income source option was coded as a binary variable: 1 = selected; 0 = not selected. Options include agricultural planting, aquaculture, local industrial labour, tourism services, migrant labour, self-employment, government subsidies/pension, no fixed income, and others.	Village-level proportions for each income source and/or a livelihood-diversity score can be calculated where applicable	Diversity of villagers’ livelihood sources (Y4); demographic/economic background information	Livelihood_diversity_std	Unclear selections coded as missing for the relevant option; blank multiple-choice items treated as no valid response if respondent intent is unclear	Multiple selections were allowed; the ‘Others’ option was retained as text where provided.
Q6_Annual_income	Approximate Personal Annual Income / 您的个人年收入大约为	Ordinal single choice	1 = No income / 无收入; 2 = ≤ 30,000 RMB / 3万元及以下; 3 = 30,000–50,000 RMB / 3–5万元; 4 = 50,000–100,000 RMB / 5–10万元; 5 = > 100,000 RMB / 10万元以上	Not aggregated for index calculation; summarised as frequency, percentage, or mean-coded category for sample description if needed	Demographic/economic background variable; not directly used in the final index calculation unless otherwise specified	N/A	Blank or invalid responses coded as missing and excluded from descriptive statistics	Income was recorded by category, not as exact income.
Q7_Irrigation_function	In recent years, has the irrigation function of this district or the Liyun River–Gaoyou Irrigation District operated well? / 近年来本灌区或者是里运河-高邮灌区的灌溉功能是否运行良好？	5-point ordered evaluation scale	1 = Very Poor / 非常差; 2 = Poor / 比较差; 3 = Average / 一般; 4 = Good / 比较好; 5 = Very Good / 非常好	Village-level mean used for aggregated subjective indicators	Operational status of irrigation services (X7)	Operational_status_irrigation_services_std	Blank or invalid responses excluded from village-level mean calculation; no imputation was applied	Positive direction: higher score indicates better perceived irrigation operation.
Q8_Navigation_function	In recent years, has the navigation function of this district or the Liyun River–Gaoyou Irrigation District operated well? / 近年来本灌区或者是里运河-高邮灌区的航运功能是否运行良好？	5-point ordered evaluation scale	1 = Very Poor / 非常差; 2 = Poor / 比较差; 3 = Average / 一般; 4 = Good / 比较好; 5 = Very Good / 非常好	Village-level mean used for aggregated subjective indicators	Navigational functionality (X8)	Navigational_functionality_std	Blank or invalid responses excluded from village-level mean calculation; no imputation was applied	Positive direction: higher score indicates better perceived navigation function.
Q9_Flood_control_drainage	In recent years, has the flood control and drainage function of this district or the Liyun River–Gaoyou Irrigation District been effective? / 近年来本灌区或者是里运河-高邮灌区的防洪排涝功能是否良好？	5-point ordered evaluation scale	1 = Very Poor / 非常差; 2 = Poor / 比较差; 3 = Average / 一般; 4 = Good / 比较好; 5 = Very Good / 非常好	Village-level mean used for aggregated subjective indicators	Flood mitigation capacity (X9)	Flood_mitigation_capacity_std	Blank or invalid responses excluded from village-level mean calculation; no imputation was applied	Positive direction: higher score indicates better perceived flood-control and drainage function.
Q10_Maintenance_status	In recent years, has the maintenance of sluice stations and channels in this district or the Liyun River–Gaoyou Irrigation District been good? / 近年来本灌区或者是里运河-高邮灌区的闸站和渠道维护状况是否良好？	5-point ordered evaluation scale	1 = Very Poor / 非常差; 2 = Poor / 比较差; 3 = Average / 一般; 4 = Good / 比较好; 5 = Very Good / 非常好	Village-level mean used for aggregated subjective indicators	Management and maintenance status (X10)	Management_maintenance_status_std	Blank or invalid responses excluded from village-level mean calculation; no imputation was applied	Positive direction: higher score indicates better perceived maintenance of sluice stations and channels.
Q11_Resident_participation_heritage_management	Have residents participated in the maintenance, protection, promotion, or management of the Liyun River–Gaoyou Irrigation Heritage? / 村民是否参与过“里运河–高邮灌区遗产”的维护、保护、宣传或管理工作？	5-point frequency scale	1 = Never / 从未参加; 2 = Rarely / 很少参加; 3 = Occasionally / 偶尔参加; 4 = Frequently / 较多参加; 5 = Very Frequently / 经常参加	Village-level mean or proportion of higher-frequency responses used where applicable	Governance and participation level (X11)	Governance_participation_std	Blank or invalid responses excluded from aggregation; no imputation was applied	Positive direction: higher score indicates stronger participation in heritage-related governance or management.
Q12_Heritage_awareness	Do you understand the Liyun River–Gaoyou Irrigation Heritage? / 您是否了解“里运河-高邮灌区遗产”？	5-point awareness scale	1 = Completely Unaware / 完全不了解; 2 = Not very aware / 不太了解; 3 = Average / 一般; 4 = Well-aware / 比较了解; 5 = Very well-aware / 非常了解	Village-level mean used for aggregated subjective indicators	Heritage awareness (X12)	Heritage_awareness_std	Blank or invalid responses excluded from village-level mean calculation; no imputation was applied	Positive direction: higher score indicates greater heritage awareness.
Q13_Perceived_heritage_importance	Do you think the Liyun River–Gaoyou Irrigation Heritage is important to the local area? / 您觉得“里运河-高邮灌区遗产”对本地来说重要吗？	5-point importance scale	1 = Not important at all / 完全不重要; 2 = Not very important / 不太重要; 3 = Average / 一般; 4 = Important / 比较重要; 5 = Very important / 非常重要	Village-level mean used for aggregated subjective indicators; may be combined with Q14 where a composite identity indicator is used	Sense of heritage identity (X13)	Heritage_identity_std	Blank or invalid responses excluded from village-level mean calculation; no imputation was applied	Positive direction: higher score indicates stronger perceived importance of irrigation heritage.
Q14_Support_public_funding	Do you support the government allocating a portion of tax revenue for the protection, maintenance, and promotion of the Liyun River–Gaoyou Irrigation Heritage? / 您是否支持政府将部分税收用于“里运河-高邮灌区遗产”的保护、维修和宣传？	5-point support scale	1 = Not support at all / 完全不支持; 2 = Not very support / 不太支持; 3 = Average / 一般; 4 = Support / 比较支持; 5 = Highly support / 非常支持	Village-level mean used for aggregated subjective indicators; may be combined with Q13 where a composite identity/support indicator is used	Sense of heritage identity (X13) / public support for heritage protection and maintenance	Heritage_identity_std	Blank or invalid responses excluded from village-level mean calculation; no imputation was applied	Positive direction: higher score indicates stronger support for heritage protection, maintenance, and promotion.
Q15_Cultural_activity_participation	Have residents participated in cultural activities related to the Liyun River–Gaoyou Irrigation District? / 村民是否参加过里运河高邮灌区相关的文化活动？	5-point frequency scale	1 = Never / 从未参加; 2 = Rarely / 很少参加; 3 = Occasionally / 偶尔参加; 4 = Frequently / 较多参加; 5 = Very Frequently / 经常参加	Village-level mean or proportion of higher-frequency responses used where applicable	Heritage engagement and cultural transmission (X14)	Heritage_engagement_transmission_std	Blank or invalid responses excluded from aggregation; no imputation was applied	Positive direction: higher score indicates greater participation in irrigation-heritage-related cultural activities.
Q16_Village_economic_development	How would you evaluate the overall economic development of your village? / 您觉得村子的整体经济发展状况如何？	5-point ordered evaluation scale	1 = Very Poor / 非常贫穷; 2 = Poor / 贫穷; 3 = Average / 一般; 4 = Wealthy / 富有; 5 = Very Wealthy / 非常富有	Village-level mean used for aggregated survey indicators and supplementary production-development comparison where applicable	Subjective evaluation of village economic development; used to support the interpretation and validation of the production-development dimension in RHSQ	Village_economic_development_std	Blank or invalid responses excluded from village-level mean calculation; no imputation was applied	Positive direction: higher score indicates better perceived village economic development.
Q17_Village_preference	As a local resident, do you like the village where you currently live? / 作为本地居民，您喜欢现在居住的村子吗？	5-point preference scale	1 = Dislike very much / 非常讨厌; 2 = Dislike / 讨厌; 3 = Average / 一般; 4 = Like / 喜欢; 5 = Like very much / 非常喜欢	Village-level mean used for aggregated subjective indicators	Place attachment and cultural identity (Y9)	Place_attachment_cultural_identity_std	Blank or invalid responses excluded from village-level mean calculation; no imputation was applied	Positive direction: higher score indicates stronger place attachment or residential preference.
Q18_Village_management_satisfaction	Are you satisfied with the current management of the village? / 您对当前村里的管理满意吗？	5-point satisfaction scale	1 = Very dissatisfied / 非常不满意; 2 = Dissatisfied / 不满意; 3 = Average / 一般; 4 = Satisfied / 满意; 5 = Very satisfied / 非常满意	Village-level mean used for aggregated subjective indicators	Community governance satisfaction (Y10)	Community_governance_satisfaction_std	Blank or invalid responses excluded from village-level mean calculation; no imputation was applied	Positive direction: higher score indicates higher satisfaction with village management and governance.
Q19_Ecological_environment_quality	How would you evaluate the quality of the ecological environment in your village? / 您觉得村子的生态环境质量如何？	5-point ordered evaluation scale	1 = Very Poor / 非常差; 2 = Poor / 比较差; 3 = Average / 一般; 4 = Good / 比较好; 5 = Very Good / 非常好	Village-level mean used for aggregated subjective indicators	Perception of the ecological environment (Y16)	Ecological_environment_perception_std	Blank or invalid responses excluded from village-level mean calculation; no imputation was applied	Positive direction: higher score indicates better perceived ecological environment quality.
CONSENT	Informed Consent / 知情同意	Statement, not an analytical variable	Participation indicates consent to use anonymised data for academic research	Not aggregated	Ethical and survey protocol documentation	N/A	Not applicable	No separate score was used in analysis.

## Sheet: Anonymisation_notes
Anonymisation notes
This sheet documents how the manuscript, response letter, supplementary datasets, and related files were anonymised for double-blind peer review and personal data protection.
Item	Treatment	Applies to	Status	Notes
Respondent names	Not collected in the shared dataset or removed before analysis and sharing.	Anonymised_questionnaire; Aggregated_survey_data	Completed	No respondent names are included in the supplementary dataset.
Phone numbers and contact details	Not collected in the shared dataset or removed before analysis and sharing.	Anonymised_questionnaire	Completed	No phone numbers, e-mail addresses, or other direct contact details are included.
Detailed household addresses	Removed; only village-level information was retained.	Anonymised_questionnaire; Village_level_dataset	Completed	Village names are retained because they are the spatial unit of analysis and are necessary for verifying village-level results.
Personal identity numbers and direct identifiers	Not collected or removed before analysis and sharing.	All survey-related data	Completed	No ID-card numbers, household registration numbers, or other direct personal identifiers are included.
Questionnaire response ID	Responses are represented by anonymous record IDs only.	Anonymised_questionnaire	Completed	Anonymous IDs are used only for data organisation and cannot identify individuals.
Demographic variables	Retained only as broad categorical variables.	Anonymised_questionnaire; Questionnaire_codebook	Completed	Gender, age group, residence duration, education, income source, and income category are retained as non-identifying analytical variables.
Original questionnaire forms	Not shared in a form that could reveal personal handwriting or fieldwork context; anonymised tabular data are provided instead.	Questionnaire materials	Completed	The anonymised questionnaire dataset and questionnaire codebook provide the information necessary to verify the survey-based indicators.
Village-level aggregation	Individual responses were aggregated to village-level indicators where required for the main analysis.	Aggregated_survey_data; Village_level_dataset	Completed	Aggregation reduces privacy risk and matches the village-level analytical framework.
Expert scoring data	Shared only in anonymised or aggregated form, without expert names, affiliations, or identifiable comments.	AHP_weights; Combined_weights	Completed	Expert-identifying information is not included in the anonymised supplementary files.
Author names and affiliations	Removed or redacted from anonymised manuscript, supplementary files, and response letter.	Manuscript; Supplementary materials; Response letter	Completed	Author-identifying details are provided only in the cover letter, as requested by the editorial office.
Acknowledgements and funding information	Removed or redacted for double-blind peer review.	Manuscript; Supplementary materials	Completed	These details may be restored after peer review or acceptance if required by the journal.
Institutional ethics committee name	Redacted in the anonymised manuscript and response letter.	Ethics declaration in anonymised manuscript	Completed	The full editable ethics statement with institutional details is provided only in the cover letter.
Author profile links	Not included in the anonymised manuscript, supplementary files, or response letter.	Cover letter only	Completed	Author profile links are provided only in the cover letter or submission-system fields.
File metadata	Inspected and removed where possible before upload.	All uploaded Word, Excel, and PDF files	Completed	Document properties and file metadata were checked; author names and institution-related metadata are not included in this supplementary workbook.
Map labels and institutional identifiers	Redacted or generalised where necessary before submission.	Figures; supplementary spatial outputs	Completed	Author institutions, project team labels, and local authority identifiers that are not necessary for peer review have been removed or generalised.
Data use statement	The shared anonymised data are provided for academic peer review and verification of the manuscript results.	All supplementary files	Completed	This is consistent with the Data Availability Statement.

## Sheet: Restricted_data_explanation
Restricted data explanation
This sheet lists original source materials that are not shared in full, the reasons for restriction, and the processed alternatives provided for peer review and verification.
Material not fully shared	Reason for restriction	Alternative material provided	Where alternative is provided	Notes
Original irrigation engineering maps	These files were provided by local management authorities and are subject to third-party restrictions. They may also contain potentially sensitive local infrastructure information.	Processed village-level canal indicators, including main canal density, branch canal density, canal network connectivity, and related heritage spatial indicators.	Raw_objective_indicators; Village_level_dataset; Standardised_indicators; Data_dictionary	The processed indicators are sufficient to verify the calculation of IHVR and CCD results.
Original administrative spatial data	The original administrative spatial files are subject to third-party restrictions and cannot be redistributed in full.	Village-level analytical units, processed village-level indicator values, and standardised indicator values.	Village_level_dataset; Standardised_indicators; Data_dictionary	Administrative village names are retained because they are required as the basic village-level analytical units.
Raw GIS layers containing local irrigation infrastructure	Full GIS layers may reveal detailed local infrastructure locations and are not permitted for public redistribution.	Aggregated or standardised village-level spatial indicators and analytical outputs derived from the GIS layers.	Raw_objective_indicators; Standardised_indicators; Kriging_validation; Global_Moran_summary; Moran_LISA_results	The provided outputs enable reviewers to verify the analytical workflow without redistributing restricted GIS source files.
High-resolution base maps or third-party remote-sensing/map source files	Some base maps, imagery, or source layers are governed by third-party licences, platform terms of use, or redistribution restrictions.	Extracted and processed objective indicators used in the manuscript, together with variable definitions and standardisation directions.	Raw_objective_indicators; Data_dictionary; Standardised_indicators	Only derived analytical values necessary to verify the reported results are shared.
Point-level locations of selected local facilities or infrastructure	Exact point-level locations are not required for result verification and may contain sensitive local infrastructure information.	Village-level aggregated indicators and spatial analysis outputs.	Village_level_dataset; Standardised_indicators; Global_Moran_summary; Moran_LISA_results; Regression_results; Kmeans_village_types	Aggregation is consistent with the village-level unit of analysis used in the manuscript.
Original field notes or records that may include contextual identifiers	Original field records may contain incidental identifiable information or detailed local context not required for result verification.	Survey instruments, questionnaire codebook, anonymised questionnaire data, and village-level aggregated survey data.	Supplementary_Survey_Instruments_and_Protocols_DBPR.pdf; Questionnaire_codebook; Anonymised_questionnaire; Aggregated_survey_data	No directly identifiable personal information is included in the shared data.
Expert identities and original identifiable scoring forms	Expert names, affiliations, signatures, or contact details are participant-identifying information and are not included in the anonymised files.	Anonymised AHP weights, entropy weights, combined weights, and consistency-test results.	AHP_weights; Entropy_weights; Combined_weights	The weighting process and final weights are provided for methodological verification.
Ethics approval document with institutional identifiers	Full institutional identifiers may compromise double-blind peer review if included in the anonymised supplementary files.	The anonymised ethics statement is included in the manuscript; the editable ethics statement with institutional details is provided in the cover letter where required.	Anonymised manuscript; cover letter only for identifying details	This item concerns double-blind peer-review anonymisation. If the journal requests a separate ethics approval or exemption document, it should be uploaded according to the editorial office’s instructions.

## Sheet: Village_level_dataset
Village_level_dataset — supplementary raw materials
Village_ID	Village_name	U1_IHVR	U2_RHSQ	C_coupling_degree	T_comprehensive_development_index	D_CCD	CCD_level	Cluster_ID	Cluster_type	Urban_rural_gradient	Irrigation_network_location
V001	八桥社区居委会	0.490034515301600	0.473849320603813	0.994605476732040	0.708286341738846	0.839324415579553	Relatively high coordination	3	Modernization–Dominated Type	6	7
V002	保安村委会	0.363165920904148	0.283012370592014	0.856072157269330	0.154741396438330	0.363964010676646	Near imbalance	4	Dual–Weak Type	5	8
V003	保丰村委会	0.596466609962222	0.370284555271839	0.908335582475582	0.684271014763373	0.788382972143771	Intermediate coordination	2	Coordinated Type	3	2
V004	北太平村委会	0.399493148130849	0.393029955744094	0.987116640765731	0.415813883079975	0.640669028008737	Intermediate coordination	1	Value–Unrealized Type	3	2
V005	伯勤村委会	0.536442814621278	0.381500110677434	0.960067975124753	0.610400085280657	0.765523072082989	Intermediate coordination	2	Coordinated Type	4	6
V006	伯勤社区居委会	0.288737238592701	0.396548494763389	0.002464865369132	0.247690482731805	0.024708777653885	Dysfunctional development	4	Dual–Weak Type	5	8
V007	昌农村委会	0.485538031135632	0.423474123096650	0.999779948031952	0.607883610817799	0.779583122465395	Intermediate coordination	3	Modernization–Dominated Type	3	1
V008	朝阳社区居委会	0.425209352569648	0.415455938493878	0.990761841626432	0.497904268836442	0.702356426856091	Intermediate coordination	3	Modernization–Dominated Type	2	1
V009	车逻村委会	0.571520648477208	0.448206644005649	0.991528777353385	0.789275173905754	0.884640632222007	Relatively high coordination	2	Coordinated Type	2	1
V010	陈堡村委会	0.457585270024807	0.393060927288762	0.998784665416223	0.507471465690251	0.711937299253044	Intermediate coordination	1	Value–Unrealized Type	5	4
V011	陈甸村委会	0.307564588093126	0.351584083488443	0.719896577218094	0.194087679741053	0.373795473923623	Near imbalance	4	Dual–Weak Type	9	9
V012	大庵村委会	0.457288828241976	0.351578920307454	0.971829409929901	0.430164726938432	0.646565335254863	Intermediate coordination	1	Value–Unrealized Type	5	10
V013	大昌村委会	0.535410238647540	0.355038326221084	0.920925665198129	0.559755352454127	0.717978460893522	Intermediate coordination	2	Coordinated Type	7	1
V014	大卢村委会	0.387727133486098	0.293152181570851	0.882248627079101	0.212252256886180	0.432734632577834	Near imbalance	4	Dual–Weak Type	5	10
V015	大树庵村委会	0.497622996100473	0.355399966796929	0.948999051770428	0.500841953552251	0.689418986544420	Intermediate coordination	1	Value–Unrealized Type	2	6
V016	灯塔村委会	0.524860905503061	0.431158564828371	0.996079109189586	0.684122590704785	0.825493925311201	Relatively high coordination	2	Coordinated Type	2	1
V017	狄奔村委会	0.423982604568017	0.321636460604686	0.946118059241752	0.322183160216435	0.552108056692119	Low coordination	1	Value–Unrealized Type	7	3
V018	东墩社区居委会	0.433134935986414	0.455666013166994	0.975177220215777	0.584884643738166	0.755225913900920	Intermediate coordination	3	Modernization–Dominated Type	2	1
V019	东湖村委会	0.480187395486362	0.434794860311841	0.999639609473874	0.620416675287824	0.787523385681847	Intermediate coordination	3	Modernization–Dominated Type	4	2
V020	二沟社区居委会	0.458390785052814	0.408595459665135	0.999989239050564	0.537517042049572	0.733151592684529	Intermediate coordination	3	Modernization–Dominated Type	4	8
V021	佛塔村委会	0.403164580114673	0.532759112032222	0.882848451860520	0.680430708246425	0.775059479894101	Intermediate coordination	3	Modernization–Dominated Type	2	3
V022	管伙村委会	0.515804694614309	0.503846985614329	0.993944148060179	0.804487261467531	0.894212170418526	Relatively high coordination	3	Modernization–Dominated Type	1	1
V023	郭楼村委会	0.546341875932767	0.378669914000535	0.951164401244397	0.620766497279407	0.768408090598576	Intermediate coordination	2	Coordinated Type	3	7
V024	果林社区居委会	0.404790338166458	0.386844761065272	0.993571488600981	0.412709381001321	0.640356364879019	Intermediate coordination	1	Value–Unrealized Type	10	7
V025	恒丰村委会	0.438307594945812	0.355344009320963	0.987383873637169	0.407209209768867	0.634091323803058	Intermediate coordination	1	Value–Unrealized Type	6	5
V026	花阳村委会	0.473693185136170	0.381122873010579	0.989867568689842	0.510757093260081	0.711042813124813	Intermediate coordination	1	Value–Unrealized Type	5	8
V027	剑鸣村委会	0.416211138663546	0.320882404906846	0.953003600532864	0.308532261499328	0.542247504456597	Low coordination	1	Value–Unrealized Type	3	7
V028	界首村委会	0.509489095668801	0.446004146712284	0.999918335513040	0.687383427495893	0.829052044615380	Relatively high coordination	2	Coordinated Type	9	1
V029	金港村委会	0.456580551387616	0.426060886940662	0.997787169242211	0.567014779225829	0.752170241024090	Intermediate coordination	3	Modernization–Dominated Type	6	7
V030	金沟村委会	0.468271881652971	0.322464682145012	0.898658605265340	0.393553073521752	0.594701484905617	Low coordination	1	Value–Unrealized Type	7	7
V031	金家村委会	0.551575158880264	0.350653651899901	0.899826004643419	0.577122389798042	0.720631482938564	Intermediate coordination	2	Coordinated Type	3	4
V032	金塘社区居委会	0.492639050098437	0.455440894779057	0.998647576201374	0.678294300286439	0.823029136138119	Relatively high coordination	3	Modernization–Dominated Type	4	1
V033	老人桥村委会	0.536937133960289	0.408851687818074	0.983178414230059	0.661844299764286	0.806666615839192	Relatively high coordination	2	Coordinated Type	6	2
V034	六安村委会	0.516301420611133	0.298872660877056	0.727349114422926	0.425585765411252	0.556371664971247	Low coordination	1	Value–Unrealized Type	6	1
V035	龙奔村委会	0.517244364418030	0.327533772464803	0.865567350899455	0.480163094872353	0.644680927303070	Intermediate coordination	1	Value–Unrealized Type	2	5
V036	龙奔社区居委会	0.316274112585952	0.351640100196038	0.812944416620591	0.207924703806052	0.411134074283098	Near imbalance	4	Dual–Weak Type	2	5
V037	龙华村委会	0.456855716870072	0.363783976981670	0.984968027573422	0.452089862148646	0.667303573950037	Intermediate coordination	1	Value–Unrealized Type	7	5
V038	龙虬社区居委会	0.461456967158998	0.484027397901685	0.979504617043469	0.682078379698188	0.817373184108644	Relatively high coordination	3	Modernization–Dominated Type	2	5
V039	龙虬庄村委会	0.447906242223337	0.403110591046567	0.999849374522209	0.510825003776569	0.714666398060177	Intermediate coordination	3	Modernization–Dominated Type	1	4
V040	龙胜村委会	0.461150538332221	0.325262613824293	0.915137980766322	0.387506827614075	0.595501650506451	Low coordination	1	Value–Unrealized Type	6	5
V041	龙潭村委会	0.422769565792958	0.373577234915422	0.999889024623771	0.416483061234424	0.645319178290875	Intermediate coordination	1	Value–Unrealized Type	2	4
V042	龙腾村委会	0.379522612731890	0.341425931583297	0.999964524710933	0.288735300112945	0.537331422070876	Low coordination	1	Value–Unrealized Type	2	5
V043	龙翔村委会	0.500776448242825	0.361586353730803	0.956197271365803	0.517273717369150	0.703289212982559	Intermediate coordination	1	Value–Unrealized Type	8	1
V044	茆吴村委会	0.482850046935978	0.313143531502592	0.846002311826224	0.399274005403295	0.581194228828284	Low coordination	1	Value–Unrealized Type	6	10
V045	南丰村委会	0.520495161060925	0.347677442374132	0.917153502062329	0.522602162856238	0.692319582164874	Intermediate coordination	1	Value–Unrealized Type	3	7
V046	潘阳村委会	0.457103352374075	0.293294529821301	0.760429476538979	0.321909020300468	0.494761667674710	Near imbalance	1	Value–Unrealized Type	5	9
V047	甓湖社区居委会	0.558324175314921	0.490447279282665	0.999991631996909	0.846711402711633	0.920165375042985	Higher coordination	2	Coordinated Type	9	1
V048	钱镜村委会	0.427453026489309	0.262832364744405	0.003515052948913	0.218729430474989	0.027728063935391	Dysfunctional development	4	Dual–Weak Type	9	8
V049	钱厦村委会	0.512449388040434	0.383561234346257	0.974585762348824	0.576384949129075	0.749490870560374	Intermediate coordination	2	Coordinated Type	4	1
V050	勤王村委会	0.517248312806335	0.448850114769584	0.999750417570839	0.704889971691359	0.839472479322540	Relatively high coordination	2	Coordinated Type	2	3
V051	清水潭村委会	0.513921794808154	0.409381356309337	0.991055247004677	0.626534626115805	0.787991388685297	Intermediate coordination	2	Coordinated Type	3	1
V052	渠南村委会	0.537664646803027	0.454578312950782	0.998752895616606	0.747693285257808	0.864153246643400	Relatively high coordination	2	Coordinated Type	1	3
V053	三河村委会	0.516968977846325	0.393984801300057	0.981004771277027	0.602819603592305	0.769005141298403	Intermediate coordination	2	Coordinated Type	4	7
V054	三新村委会	0.531612134183770	0.383040127297088	0.964336147864625	0.605635676152130	0.764222726009854	Intermediate coordination	2	Coordinated Type	2	5
V055	上庄村委会	0.518479831713050	0.370386625045543	0.956918878691194	0.561489787526882	0.733007624705760	Intermediate coordination	2	Coordinated Type	4	1
V056	十里村委会	0.445206557027758	0.487374247550644	0.966848679604981	0.662654123760317	0.800428800451644	Relatively high coordination	3	Modernization–Dominated Type	1	3
V057	双河村委会	0.528421822203732	0.398651262176182	0.979650478460657	0.629522489189144	0.785310134746706	Intermediate coordination	2	Coordinated Type	8	4
V058	双马村村委会	0.459239548523929	0.374598888158543	0.991526738200103	0.475881740286166	0.686913000106222	Intermediate coordination	1	Value–Unrealized Type	10	8
V059	双庙村委会	0.417570807938559	0.510316044799454	0.922553322415372	0.661574110228281	0.781240931733031	Intermediate coordination	3	Modernization–Dominated Type	1	2
V060	塔院村委会	0.586460584045292	0.395409074405971	0.949721503774066	0.715032887752893	0.824064384259258	Relatively high coordination	2	Coordinated Type	1	1
V061	太丰村委会	0.590360291362113	0.420156028512468	0.970741419586741	0.767022070070140	0.862890545291956	Relatively high coordination	2	Coordinated Type	3	2
V062	特平村委会	0.438873419756184	0.364410668492791	0.993443191441732	0.424896058084881	0.649700004598165	Intermediate coordination	1	Value–Unrealized Type	2	3
V063	万福村委会	0.446462351612947	0.412004203456188	0.998615610336920	0.525022369998554	0.724082546714560	Intermediate coordination	3	Modernization–Dominated Type	6	3
V064	吴堡村委会	0.386497482158617	0.319694836182927	0.982141388460837	0.259479688156624	0.504822484843466	Low coordination	4	Dual–Weak Type	6	4
V065	卸甲村委会	0.464139349378161	0.403746521402596	0.999581442356413	0.537599489404772	0.733058301248470	Intermediate coordination	3	Modernization–Dominated Type	3	6
V066	卸甲社区居委会	0.447053647780952	0.371597354041235	0.994284052043929	0.451106995914598	0.669722697691612	Intermediate coordination	1	Value–Unrealized Type	5	8
V067	薛北村委会	0.366818160173124	0.275105176069157	0.725465224867106	0.145853369272875	0.325286869297196	Near imbalance	4	Dual–Weak Type	7	8
V068	阳沟村委会	0.450877963806462	0.370016775371561	0.992060684538400	0.454209424809111	0.671269925514260	Intermediate coordination	1	Value–Unrealized Type	5	2
V069	杨庙社区居委会	0.368435638486076	0.380833559602991	0.962890121483531	0.344250078382840	0.575738655810749	Low coordination	1	Value–Unrealized Type	8	6
V070	腰圩村委会	0.438489060301584	0.486935380454047	0.961490525117385	0.651248974153461	0.791308863934285	Intermediate coordination	3	Modernization–Dominated Type	1	1
V071	一沟村委会	0.508006869914105	0.379188324787434	0.972717074437024	0.561279773425736	0.738895404740994	Intermediate coordination	2	Coordinated Type	2	5
V072	一平村委会	0.500837976007258	0.325532856701391	0.874804326129223	0.450586943337370	0.627833901066894	Intermediate coordination	1	Value–Unrealized Type	4	8
V073	应龙村委会	0.445916799214645	0.345014468456052	0.971023184141322	0.400073523068940	0.623282172263124	Intermediate coordination	1	Value–Unrealized Type	8	1
V074	营北村村委会	0.502257051628375	0.317526278321100	0.843342567433513	0.437993548458787	0.607765253758841	Intermediate coordination	1	Value–Unrealized Type	9	4
V075	营东村委会	0.460283731135442	0.304273807179960	0.829918702484814	0.347261365657659	0.536841412346057	Low coordination	1	Value–Unrealized Type	10	6
V076	营南村委会	0.405832841742082	0.274968359317103	0.622124319305387	0.207118658753363	0.358961773163077	Near imbalance	4	Dual–Weak Type	9	5
V077	营南社区居委会	0.379689245571811	0.450586918296461	0.909333285565898	0.491202693905369	0.668331474290856	Intermediate coordination	3	Modernization–Dominated Type	9	5
V078	营西村委会	0.578018957417203	0.356679937211694	0.893976972872220	0.629982029486745	0.750459477709795	Intermediate coordination	2	Coordinated Type	9	4
V079	永安村委会	0.502338060082892	0.411094261425952	0.994816697690481	0.611442186986896	0.779918519646091	Intermediate coordination	2	Coordinated Type	8	1
V080	俞胡村委会	0.473283388616307	0.383512634178421	0.991370297402257	0.514537602682777	0.714210960568563	Intermediate coordination	1	Value–Unrealized Type	5	9
V081	闸河村委会	0.540329747089235	0.388569557447627	0.965565295003103	0.629624146125578	0.779707140146107	Intermediate coordination	2	Coordinated Type	4	1
V082	张余村委会	0.497400626769875	0.466734201377733	0.997625244850616	0.706721586505536	0.839668563052590	Relatively high coordination	3	Modernization–Dominated Type	5	4
V083	长宁村委会	0.479771746507110	0.310292599584709	0.836371619736181	0.389139180540641	0.570495369596972	Low coordination	1	Value–Unrealized Type	7	6
V084	志光村委会	0.456222721161621	0.374964429486728	0.992833192229581	0.471801889557130	0.684412577404122	Intermediate coordination	1	Value–Unrealized Type	8	5
V085	周邶墩村委会	0.559362863280750	0.426658507220741	0.985649169712661	0.730189913367533	0.848357873684961	Relatively high coordination	2	Coordinated Type	1	4
V086	周巷村村委会	0.388426068756271	0.444589877404490	0.931620159456859	0.493870365382781	0.678306411991604	Intermediate coordination	3	Modernization–Dominated Type	10	9
V087	周巷社区居委会	0.397433015491996	0.361276319654157	0.999519862932482	0.353746513574900	0.594623130025420	Low coordination	1	Value–Unrealized Type	10	9
V088	砖场村委会	0.605833229640887	0.381272230469549	0.920789041806574	0.719393439616365	0.813885493141565	Relatively high coordination	2	Coordinated Type	3	1
V089	子婴村委会	0.500475713759837	0.417930950051091	0.997185234444000	0.621169579975696	0.787033120800863	Intermediate coordination	2	Coordinated Type	9	1

## Sheet: Standardised_indicators
Standardised_indicators — supplementary raw materials
Village_ID	Village_name	Main_canal_density_std	Branch_canal_density_std	Canal_network_connectivity_std	Heritage_element_agglomeration_std	Heritage_element_diversity_std	Irrigated_area_proportion_std	Operational_status_irrigation_services_std	Navigational_functionality_std	Flood_mitigation_capacity_std	Management_maintenance_status_std	Governance_participation_std	Heritage_awareness_std	Heritage_identity_std	Heritage_engagement_transmission_std	Farmland_proportion_std	Nighttime_light_proxy_std	Rural_economic_diversity_std	Livelihood_diversity_std	Village_density_std	Road_density_std	Population_density_std	Public_service_proximity_std	Place_attachment_cultural_identity_std	Community_governance_satisfaction_std	NDVI_std	Water_system_connectivity_std	Water_area_density_std	Landscape_diversity_std	Ecological_land_proportion_std	Ecological_environment_perception_std	standardisation directions
V001	八桥社区居委会	0.405726883166163	0.320840931168000	0.000000000000000	0.100000000000000	0.500000130246503	0.110782747829393	0.753424657534247	0.341451040081178	0.921867072552003	0.874175545408423	0.163876204972094	0.219685438863522	0.835616438356164	0.087772704211059	0.187746576626974	0.256229524734945	0.614227347111511	0.733333333333333	0.495074918385358	0.521347087348358	0.581795339768335	0.934867524179262	0.834601725012685	0.670218163368849	0.733150009282481	0.000000000000000	0.004965651113809	0.615548785118098	0.115112885755331	0.874175545408423	Positive
V002	保安村委会	0.000000000000000	0.188655391568000	0.271428517142868	0.533333333333333	0.000000000000000	0.256223991568258	0.634703196347032	0.183561643835616	0.869101978691020	0.721765601217656	0.081278538812785	0.210958904109589	0.914155251141552	0.052054794520548	0.983494317526168	0.000000000000000	0.379810622454736	0.280000000000000	0.060400235996086	0.082154407040417	0.072828575506569	0.264182857318538	0.712024353120243	0.625570776255708	0.196852771795770	0.220779252319114	0.209084605924612	0.492307286066054	0.999999797413207	0.693759512937595	Positive
V003	保丰村委会	0.188774065473790	0.059791361979400	0.466666573333352	0.233333333333333	1.000000260493005	0.989064876617517	0.792998477929985	0.148655504819887	0.925925925925927	0.827498731608320	0.108066971080670	0.146626078132928	0.886352105530189	0.078640284119735	0.920448989332660	0.067782330310411	0.450146216530606	0.600000000000000	0.143408651088554	0.079842351880053	0.141505095428115	0.640872794738147	0.695585996955860	0.769660071029933	0.929570067240249	0.476190544217696	0.029100255134054	0.630163249632411	0.198968898489711	0.847792998477930	Positive
V004	北太平村委会	0.000000000000000	0.028958595544300	0.000000000000000	0.033333333333333	0.000000000000000	0.718204725808389	0.673515981735160	0.385083713850837	0.898021308980213	0.918569254185693	0.086757990867580	0.356925418569254	0.873668188736682	0.092846270928463	0.943071229218972	0.000000000000000	0.531915332744591	0.750000000000000	0.096840294855922	0.074339642375265	0.054464299116697	0.456242984947912	0.805936073059361	0.704718417047184	0.561151660614747	0.428571489795927	0.004926625840830	0.822597262766535	0.578674270991351	0.866057838660578	Positive
V005	伯勤村委会	0.000000000000000	0.132127148329000	0.244444395555565	0.433333333333333	0.750000195369756	0.851806659820015	0.753424657534247	0.341451040081178	0.921867072552003	0.874175545408423	0.163876204972094	0.219685438863522	0.835616438356164	0.087772704211059	0.910444234750562	0.000000000000000	0.558807373042811	0.733333333333333	0.104972430972693	0.055172598011888	0.084453899942058	0.642985489223396	0.834601725012685	0.670218163368849	0.688795291002853	0.178571454081636	0.008430401302447	0.683845309826821	0.396230065750337	0.874175545408423	Positive
V006	伯勤社区居委会	0.000000000000000	0.000000000000000	0.000000000000000	0.033333333333333	0.000000000000000	0.296688976490177	0.697108066971081	0.000000000000000	1.000000000000000	0.595129375951294	0.038051750380518	0.000000000000000	0.905631659056316	0.048706240487062	0.448276476131121	0.054839547229269	0.712222870213574	0.700000000000000	0.592884686181141	0.118302891283858	0.000000000000000	0.782313887672417	0.683409436834094	0.709284627092846	0.869514378694250	0.000000000000000	0.002877226782506	0.639671591408292	0.141455567197033	0.607305936073059	Positive
V007	昌农村委会	0.000000000000000	0.192593094566000	0.288888831111122	0.333333333333333	0.500000130246503	0.595917183322673	0.673515981735160	0.385083713850837	0.898021308980213	0.918569254185693	0.086757990867580	0.356925418569254	0.873668188736682	0.092846270928463	0.904311443208369	0.059709129299439	0.710467889099104	0.750000000000000	0.125482266456018	0.120886096875677	0.148797229555414	0.631714773524560	0.805936073059361	0.704718417047184	0.589906992291199	0.218487426170472	0.021785575575740	0.737177627622005	0.589697502040130	0.866057838660578	Positive
V008	朝阳社区居委会	0.296023035503154	0.000000000000000	0.000000000000000	0.066666666666667	0.500000130246503	0.000000000000000	0.792998477929985	0.148655504819887	0.925925925925927	0.827498731608320	0.108066971080670	0.146626078132928	0.886352105530189	0.078640284119735	0.000000341142673	0.278138918908787	0.665031708690951	0.600000000000000	0.711076982424976	0.313824487728134	0.575964310318865	0.991217649989971	0.695585996955860	0.769660071029933	0.287904154020918	0.000000000000000	0.020155255077495	0.040061927292872	0.000000000000000	0.847792998477930	Positive
V009	车逻村委会	0.334465228504254	0.046031541771600	0.399999920000016	0.166666666666667	0.750000195369756	0.765744901874912	0.771689497716895	0.274277016742770	0.914155251141552	0.885540334855403	0.086757990867580	0.152511415525114	0.864231354642314	0.027092846270928	0.684582718572708	0.247425626156069	0.660935425403875	0.640000000000000	0.272013536931182	0.220595126753664	0.305635846034410	0.824425132331789	0.714459665144597	0.642009132420091	0.852259089341686	0.333333380952388	0.007264319741304	0.828494760593546	0.253158369623400	0.845357686453577	Positive
V010	陈堡村委会	0.000000000000000	0.030407072324800	0.399999920000016	0.200000000000000	0.750000195369756	0.645148612094454	0.688483003551498	0.129375951293760	0.942161339421613	0.680365296803653	0.028919330289193	0.147640791476408	0.910705225773720	0.019786910197869	0.929628878831770	0.070143207055721	0.696221410298737	0.466666666666667	0.071816874503945	0.069763649858765	0.090860756881844	0.663528754623967	0.595129375951294	0.645865043125318	0.701845057626888	0.207792237476813	0.285674637654167	0.887097870668687	0.558754598401124	0.823439878234399	Positive
V011	陈甸村委会	0.000000000000000	0.000000000000000	0.000000000000000	0.000000000000000	0.000000000000000	0.271737205132178	0.634703196347032	0.183561643835616	0.869101978691020	0.721765601217656	0.081278538812785	0.210958904109589	0.914155251141552	0.052054794520548	0.804024136787617	0.000000000000000	0.527755588501670	0.280000000000000	0.040260324576111	0.048544288489249	0.056423218104180	0.156331721325285	0.712024353120243	0.625570776255708	0.000000005184259	0.214285744897964	0.999999999999975	0.541136630564956	0.320343098853088	0.693759512937595	Positive
V012	大庵村委会	0.045197196396895	0.135729676437000	0.279999944000011	0.433333333333333	0.500000130246503	0.874144247494503	0.697108066971081	0.000000000000000	1.000000000000000	0.595129375951294	0.038051750380518	0.000000000000000	0.905631659056316	0.048706240487062	0.989206813960571	0.014122748013152	0.377589273331504	0.700000000000000	0.081648868503908	0.054440554514548	0.075345869677426	0.419438055410076	0.683409436834094	0.709284627092846	0.893802012386726	0.208791238618529	0.091654468701935	0.598496359593052	0.314762214070181	0.607305936073059	Positive
V013	大昌村委会	0.171657243817226	0.196700028077000	0.261538409230780	0.500000000000000	0.459148036632065	0.812214027583287	0.771689497716895	0.274277016742770	0.914155251141552	0.885540334855403	0.086757990867580	0.152511415525114	0.864231354642314	0.027092846270928	0.908345068808141	0.000000000000000	0.591848103493695	0.640000000000000	0.128728377822224	0.082500101780763	0.122794612983805	0.559924362801032	0.714459665144597	0.642009132420091	0.864496272559441	0.186813213500789	0.017333642281152	0.558485294505465	0.179256938178516	0.845357686453577	Positive
V014	大卢村委会	0.000000000000000	0.198619504404000	0.257142805714296	0.466666666666667	0.000000000000000	0.543524314952821	0.634703196347032	0.183561643835616	0.869101978691020	0.721765601217656	0.081278538812785	0.210958904109589	0.914155251141552	0.052054794520548	0.957014145541533	0.000000000000000	0.584690600214699	0.280000000000000	0.054251907285116	0.077583454954384	0.068887762443776	0.356088365762959	0.712024353120243	0.625570776255708	0.243428761990220	0.190476217687079	0.140596478153459	0.617917698555166	0.752027290631843	0.693759512937595	Positive
V015	大树庵村委会	0.142900458416327	0.168963034883000	0.399999920000016	0.233333333333333	0.500000130246503	0.614493657605883	0.792998477929985	0.148655504819887	0.925925925925927	0.827498731608320	0.108066971080670	0.146626078132928	0.886352105530189	0.078640284119735	0.826630983096932	0.021881766401157	0.422458838579680	0.600000000000000	0.093878333569248	0.040428233850966	0.145618301124181	0.520305299706059	0.695585996955860	0.769660071029933	0.595605937482008	0.285714326530618	0.034065560063270	0.738827905042335	0.689602945049539	0.847792998477930	Positive
V016	灯塔村委会	0.209259582805295	0.158803127512000	0.266666613333344	0.266666666666667	0.500000130246503	0.731273935863124	0.716133942161339	0.289954337899543	0.871385083713851	0.892694063926941	0.159817351598174	0.202435312024353	0.889649923896499	0.063926940639269	0.875979685783292	0.207750372038136	0.454283289880817	0.800000000000000	0.152225134625530	0.021232488023075	0.146017270606965	0.756844762551368	0.713089802130898	0.675038051750381	0.824674304304654	0.222222253968258	0.031218613400362	0.775991783054022	0.345710967844494	0.890410958904109	Positive
V017	狄奔村委会	0.000000000000000	0.100266000108000	0.299999940000012	0.166666666666667	0.000000000000000	0.838569569891061	0.754439370877726	0.231861998985288	0.860984271943175	0.771689497716895	0.109081684424149	0.304921359715881	0.946220192795534	0.068493150684932	0.961995607917819	0.012594372498465	0.429752727276023	0.466666666666667	0.092613408294558	0.126729519020050	0.065104515687335	0.576386995117776	0.773718924403857	0.630644342973111	0.751575209399775	0.250000035714291	0.017598651502963	0.662514898902677	0.340270169201112	0.789954337899543	Positive
V018	东墩社区居委会	0.000000000000000	0.129380360379000	0.333333266666680	0.233333333333333	0.000000000000000	0.774835331554543	0.716133942161339	0.289954337899543	0.871385083713851	0.892694063926941	0.159817351598174	0.202435312024353	0.889649923896499	0.063926940639269	0.901172825677471	0.217835488982091	0.642060489078500	0.800000000000000	0.134339308727231	0.182190351520382	0.167396267071958	0.768802730588303	0.713089802130898	0.675038051750381	0.804755588356772	0.357142908163272	0.043799463717546	0.659171285394819	0.248896219741693	0.890410958904109	Positive
V019	东湖村委会	0.000000000000000	0.172165117267000	0.371428497142872	0.300000000000000	0.500000130246503	0.534556510187150	0.673515981735160	0.385083713850837	0.898021308980213	0.918569254185693	0.086757990867580	0.356925418569254	0.873668188736682	0.092846270928463	0.832921022723296	0.045170631889188	0.799117535390787	0.750000000000000	0.058230284724317	0.166520599787745	0.074996309821974	0.325973304457862	0.805936073059361	0.704718417047184	0.248388089721114	0.220238126700685	0.151742884609470	0.954625762493932	0.815270100088746	0.866057838660578	Positive
V020	二沟社区居委会	0.144850228800589	0.159542102572000	0.439999912000017	0.266666666666667	0.792481456796401	0.378219725289682	0.697108066971081	0.000000000000000	1.000000000000000	0.595129375951294	0.038051750380518	0.000000000000000	0.905631659056316	0.048706240487062	0.883129418086435	0.000000000000000	0.621559142171127	0.700000000000000	0.161603066839999	0.137453506211762	0.164149273407517	0.771529767629513	0.683409436834094	0.709284627092846	0.282432364151705	0.428571489795927	0.027777293954476	0.798921506779970	0.724611530881254	0.607305936073059	Positive
V021	佛塔村委会	0.000000000000000	0.156515512809000	0.349999930000014	0.100000000000000	0.000000000000000	0.553199998080957	0.771689497716895	0.274277016742770	0.914155251141552	0.885540334855403	0.086757990867580	0.152511415525114	0.864231354642314	0.027092846270928	0.633097149382155	0.907650759489857	0.736341453090032	0.640000000000000	0.000000218296373	0.372201295938793	0.170120499152725	0.488255186436665	0.714459665144597	0.642009132420091	0.737173028601625	0.285714326530618	0.006270235197886	0.999999950211335	0.509124886527259	0.845357686453577	Positive
V022	管伙村委会	0.183414390198347	0.140332016005000	0.299999940000012	0.400000000000000	0.500000130246503	0.602975244506937	0.716133942161339	0.289954337899543	0.871385083713851	0.892694063926941	0.159817351598174	0.202435312024353	0.889649923896499	0.063926940639269	0.657702098709877	0.586103233907404	0.618119764823789	0.800000000000000	0.148462973773280	0.099871898624158	0.247402192857215	0.776223835005863	0.713089802130898	0.675038051750381	0.819864725368477	0.220779252319114	0.008877248857467	0.868555541782689	0.267730107390249	0.890410958904109	Positive
V023	郭楼村委会	0.033047379817316	0.294565209340000	0.272727218181829	0.833333333333333	0.750000195369756	0.650307020759625	0.792998477929985	0.148655504819887	0.925925925925927	0.827498731608320	0.108066971080670	0.146626078132928	0.886352105530189	0.078640284119735	0.953585872790895	0.029487398141832	0.665280518049912	0.600000000000000	0.098925828492836	0.080381771389080	0.093163310209126	0.456342483102873	0.695585996955860	0.769660071029933	0.501764365120044	0.198757792369126	0.105506470926993	0.732363643099704	0.542972704945030	0.847792998477930	Positive
V024	果林社区居委会	0.000000000000000	0.046542013972800	0.000000000000000	0.033333333333333	0.000000000000000	0.790410948521891	0.753424657534247	0.341451040081178	0.921867072552003	0.874175545408423	0.163876204972094	0.219685438863522	0.835616438356164	0.087772704211059	0.997549630428247	0.000000000000000	0.950314768938707	0.733333333333333	0.121820264409849	0.000000000000000	0.052643054637756	0.440567128353603	0.834601725012685	0.670218163368849	0.980906340956754	0.000000000000000	0.009628180182804	0.514956397711929	0.115425327416467	0.874175545408423	Positive
V025	恒丰村委会	0.000000000000000	0.059234096751700	0.399999920000016	0.166666666666667	0.000000000000000	0.957438625482792	0.754439370877726	0.231861998985288	0.860984271943175	0.771689497716895	0.109081684424149	0.304921359715881	0.946220192795534	0.068493150684932	0.954098492328202	0.145535256287238	0.449192495035474	0.466666666666667	0.162333791697416	0.086570892292055	0.116379240519975	0.656876160469764	0.773718924403857	0.630644342973111	0.952934396283360	0.265306160349860	0.020570458439277	0.702998911658927	0.256389259707780	0.789954337899543	Positive
V026	花阳村委会	0.000000000000000	0.079148682069600	0.288888831111122	0.433333333333333	0.792481456796401	0.825624473826685	0.697108066971081	0.000000000000000	1.000000000000000	0.595129375951294	0.038051750380518	0.000000000000000	0.905631659056316	0.048706240487062	0.990381422433956	0.000000000000000	0.510874320791083	0.700000000000000	0.085884617196547	0.074082344167721	0.072700200427763	0.626887324511357	0.683409436834094	0.709284627092846	0.739065799065615	0.202380981292521	0.153578386074466	0.663364155177266	0.411831882679952	0.607305936073059	Positive
V027	剑鸣村委会	0.000000000000000	0.095630553572900	0.259999948000010	0.366666666666667	0.500000130246503	0.439206602284366	0.688483003551498	0.129375951293760	0.942161339421613	0.680365296803653	0.028919330289193	0.147640791476408	0.910705225773720	0.019786910197869	0.923719734333247	0.000000000000000	0.625419024934644	0.466666666666667	0.070405779412550	0.056355192033162	0.052829611289258	0.279797688245330	0.595129375951294	0.645865043125318	0.260388321189092	0.181818207792211	0.095201116085181	0.604543137175453	0.793974423193196	0.823439878234399	Positive
V028	界首村委会	0.253877485924452	0.214574336975000	0.599999880000024	0.300000000000000	0.685475475788854	0.089548902341897	0.771689497716895	0.274277016742770	0.914155251141552	0.885540334855403	0.086757990867580	0.152511415525114	0.864231354642314	0.027092846270928	0.424618440473628	0.158909363565839	0.682868029273363	0.640000000000000	0.198331315026821	0.385712720847155	0.437602716542382	0.937462552176605	0.714459665144597	0.642009132420091	0.421621018949812	0.476190544217696	0.022848671328631	0.840302225630593	0.351323553872668	0.845357686453577	Positive
V029	金港村委会	0.113954625281805	0.141873074630000	0.259999948000010	0.300000000000000	0.500000130246503	0.824557230815955	0.697108066971081	0.000000000000000	1.000000000000000	0.595129375951294	0.038051750380518	0.000000000000000	0.905631659056316	0.048706240487062	0.801536164192434	0.019303000258731	0.952053051553539	0.700000000000000	0.106331471612020	0.112401932911887	0.165256868008612	0.642453007232679	0.683409436834094	0.709284627092846	0.914618996295582	0.200000028571433	0.053625655117683	0.948932519216378	0.357119093865739	0.607305936073059	Positive
V030	金沟村委会	0.000000000000000	0.058355644225200	0.399999920000016	0.300000000000000	0.459148036632065	1.000000003022074	0.688483003551498	0.129375951293760	0.942161339421613	0.680365296803653	0.028919330289193	0.147640791476408	0.910705225773720	0.019786910197869	0.951415941905265	0.028942943551857	0.386377390215017	0.466666666666667	0.141873367426795	0.060632407026397	0.086698081453123	0.527292665095232	0.595129375951294	0.645865043125318	1.000000007710904	0.333333380952388	0.048683826510564	0.685733644800212	0.225036433849836	0.823439878234399	Positive
V031	金家村委会	0.050271680518175	0.093464341176300	0.259999948000010	0.500000000000000	0.960964297768092	0.763549281439611	0.754439370877726	0.231861998985288	0.860984271943175	0.771689497716895	0.109081684424149	0.304921359715881	0.946220192795534	0.068493150684932	0.891337409991735	0.066395996462402	0.552011263361534	0.466666666666667	0.112046173067018	0.042958048811032	0.112903746442806	0.599203839849451	0.773718924403857	0.630644342973111	0.726985341879533	0.285714326530618	0.054312536198693	0.798626154217749	0.392645173842209	0.789954337899543	Positive
V032	金塘社区居委会	0.114577095760332	0.294183091592000	0.266666613333344	0.433333333333333	0.500000130246503	0.486386639246623	0.792998477929985	0.148655504819887	0.925925925925927	0.827498731608320	0.108066971080670	0.146626078132928	0.886352105530189	0.078640284119735	0.774870657795044	0.129530704535796	1.000000104724341	0.600000000000000	0.161707365498777	0.166520995886531	0.170141405455825	0.715563124765839	0.695585996955860	0.769660071029933	0.494909840834424	0.238095272108849	0.077270419516132	0.994989461114423	0.736861608885824	0.847792998477930	Positive
V033	老人桥村委会	0.000000000000000	0.183768267782000	0.266666613333344	0.533333333333333	0.792481456796401	0.742311995372856	0.716133942161339	0.289954337899543	0.871385083713851	0.892694063926941	0.159817351598174	0.202435312024353	0.889649923896499	0.063926940639269	0.977336337761243	0.001769053547509	0.727704522913747	0.800000000000000	0.100550479602427	0.219629868940474	0.075295988841508	0.425793664989194	0.713089802130898	0.675038051750381	0.619187827993340	0.219047650340140	0.009715437695324	0.700176525624021	0.397884852430289	0.890410958904109	Positive
V034	六安村委会	0.110410802066519	0.235783867777000	0.242857094285724	0.433333333333333	0.500000130246503	0.717497484449625	0.771689497716895	0.274277016742770	0.914155251141552	0.885540334855403	0.086757990867580	0.152511415525114	0.864231354642314	0.027092846270928	0.951314968759229	0.000000000000000	0.070144761406752	0.640000000000000	0.115711656811378	0.113939862834483	0.103607373795430	0.445488177454184	0.714459665144597	0.642009132420091	0.694354032027178	0.193877578717205	0.009244782631483	0.443168503621350	0.129708233749764	0.845357686453577	Positive
V035	龙奔村委会	0.078826186690673	0.136655821013000	0.224999955000009	0.533333333333333	0.500000130246503	0.853454963110073	0.754439370877726	0.231861998985288	0.860984271943175	0.771689497716895	0.109081684424149	0.304921359715881	0.946220192795534	0.068493150684932	0.927503507658686	0.011924156767435	0.449739681621019	0.466666666666667	0.140381486958533	0.067958600609238	0.109886184604071	0.672835397460804	0.773718924403857	0.630644342973111	0.830333179956704	0.184873975990400	0.033449137573287	0.655569989536685	0.299598634655943	0.789954337899543	Positive
V036	龙奔社区居委会	0.000000000000000	0.000000000000000	0.000000000000000	0.000000000000000	0.000000000000000	0.408281460714924	0.688483003551498	0.129375951293760	0.942161339421613	0.680365296803653	0.028919330289193	0.147640791476408	0.910705225773720	0.019786910197869	0.349274654250374	0.160967643284345	0.482286496340238	0.466666666666667	0.665354604729516	0.145187398370941	0.000000000000000	0.900065992244269	0.595129375951294	0.645865043125318	0.669287907905070	0.000000000000000	0.000000000000000	0.597359652555475	0.075707716004614	0.823439878234399	Positive
V037	龙华村委会	0.131741419052018	0.017482508010100	0.599999880000024	0.100000000000000	0.500000130246503	0.639616629665654	0.688483003551498	0.129375951293760	0.942161339421613	0.680365296803653	0.028919330289193	0.147640791476408	0.910705225773720	0.019786910197869	0.969878949382224	0.004842396900194	0.680920891077534	0.466666666666667	0.101652250350509	0.061586847367546	0.093054496143315	0.747324157207835	0.595129375951294	0.645865043125318	0.529092834613160	0.464285780612253	0.087853144881835	0.718581323688972	0.568827129784186	0.823439878234399	Positive
V038	龙虬社区居委会	0.258194106437452	0.287015667733000	0.000000000000000	0.066666666666667	0.500000130246503	0.261763421187882	0.792998477929985	0.148655504819887	0.925925925925927	0.827498731608320	0.108066971080670	0.146626078132928	0.886352105530189	0.078640284119735	0.233610982826223	0.167891832077996	0.872051688015316	0.600000000000000	0.263765969835210	0.608582164623402	0.941868283977640	0.972708066483144	0.695585996955860	0.769660071029933	0.093026357828893	0.000000000000000	0.027632950462230	0.876332119511793	0.556101556451352	0.847792998477930	Positive
V039	龙虬庄村委会	0.310852335160926	0.029806477253700	0.449999910000018	0.133333333333333	0.000000000000000	0.479404094736022	0.754439370877726	0.231861998985288	0.860984271943175	0.771689497716895	0.109081684424149	0.304921359715881	0.946220192795534	0.068493150684932	0.670772979522614	0.225060119666648	0.522213299465885	0.466666666666667	0.189991402626853	0.166447479990243	0.166297747864497	0.840413948138279	0.773718924403857	0.630644342973111	0.542713682966166	0.428571489795927	0.131735002164368	0.822189695347393	0.445629780900742	0.789954337899543	Positive
V040	龙胜村委会	0.060127540705292	0.030040441923100	0.799999840000030	0.066666666666667	0.500000130246503	0.394743093634949	0.754439370877726	0.231861998985288	0.860984271943175	0.771689497716895	0.109081684424149	0.304921359715881	0.946220192795534	0.068493150684932	0.899681444809975	0.000000000000000	0.445934862790176	0.466666666666667	0.055996752797618	0.029998635024066	0.047873979773993	0.603736908383580	0.773718924403857	0.630644342973111	0.223780072034258	0.306122492711376	0.097756718104978	0.606157951172149	0.843096871892892	0.789954337899543	Positive
V041	龙潭村委会	0.178400227250835	0.063072665699600	0.599999880000024	0.100000000000000	0.000000000000000	0.405245449348093	0.754439370877726	0.231861998985288	0.860984271943175	0.771689497716895	0.109081684424149	0.304921359715881	0.946220192795534	0.068493150684932	0.885783494706806	0.139633243939412	0.660376007303001	0.466666666666667	0.078615965119748	0.170192906916653	0.104644195134953	0.453678974049511	0.773718924403857	0.630644342973111	0.357638876028457	0.321428617346945	0.062657744662534	0.735110984399569	0.786190020752398	0.789954337899543	Positive
V042	龙腾村委会	0.015748199495347	0.095933228435900	0.371428497142872	0.300000000000000	0.000000000000000	0.588442464466549	0.688483003551498	0.129375951293760	0.942161339421613	0.680365296803653	0.028919330289193	0.147640791476408	0.910705225773720	0.019786910197869	0.907042526495440	0.019112762040431	0.578416873612388	0.466666666666667	0.084950648085816	0.113037466338849	0.081732488929717	0.673218465596965	0.595129375951294	0.645865043125318	0.489735227189244	0.272727311688317	0.048530852970427	0.670750180656432	0.648119382906849	0.823439878234399	Positive
V043	龙翔村委会	0.060440958542174	0.164077325214000	0.266666613333344	0.466666666666667	0.405639167895705	0.773398970731577	0.771689497716895	0.274277016742770	0.914155251141552	0.885540334855403	0.086757990867580	0.152511415525114	0.864231354642314	0.027092846270928	0.804435104558591	0.036083214690261	0.454693308888859	0.640000000000000	0.119887788645750	0.158578027938314	0.115037585881310	0.442726991690831	0.714459665144597	0.642009132420091	0.821736167368910	0.214285744897964	0.072554231238833	0.733658728111924	0.257890689331376	0.845357686453577	Positive
V044	茆吴村委会	0.180624884998331	0.278278737669000	0.253333282666677	0.633333333333333	0.405639167895705	0.551461008429257	0.634703196347032	0.183561643835616	0.869101978691020	0.721765601217656	0.081278538812785	0.210958904109589	0.914155251141552	0.052054794520548	0.738224730445575	0.054203045367882	0.499873885625743	0.280000000000000	0.102284997180827	0.102848096467288	0.114497239137791	0.772392243352368	0.712024353120243	0.625570776255708	0.645901786273904	0.201680701080436	0.085041965915652	0.829517223752618	0.481254637650064	0.693759512937595	Positive
V045	南丰村委会	0.108235084436713	0.354890459731000	0.227586161379319	0.966666666666667	0.405639167895705	0.540010095346769	0.792998477929985	0.148655504819887	0.925925925925927	0.827498731608320	0.108066971080670	0.146626078132928	0.886352105530189	0.078640284119735	0.827104483078438	0.001626348026024	0.447594441878516	0.600000000000000	0.100519075663100	0.045251685829893	0.097278455090525	0.547855781688014	0.695585996955860	0.769660071029933	0.355654032251557	0.185714312244902	0.051556054722530	0.685173997671356	0.731411739274221	0.847792998477930	Positive
V046	潘阳村委会	0.042135619928311	0.123182024732000	0.288888831111122	0.400000000000000	0.459148036632065	0.713777983165589	0.634703196347032	0.183561643835616	0.869101978691020	0.721765601217656	0.081278538812785	0.210958904109589	0.914155251141552	0.052054794520548	0.919311304369971	0.001955159741510	0.499495733690968	0.280000000000000	0.105815264464689	0.070585457519447	0.116037145385788	0.602584400642579	0.712024353120243	0.625570776255708	0.619263966179211	0.269841308390028	0.064571383491588	0.671905107725672	0.407703919147061	0.693759512937595	Positive
V047	甓湖社区居委会	0.999999999858990	0.000000000000000	0.000000000000000	0.066666666666667	0.500000130246503	0.000631764820204	0.792998477929985	0.148655504819887	0.925925925925927	0.827498731608320	0.108066971080670	0.146626078132928	0.886352105530189	0.078640284119735	0.070920000029344	0.245881283305629	0.936776005736022	0.600000000000000	0.999999157932281	0.447250444351335	0.999999999874289	1.000000037981214	0.695585996955860	0.769660071029933	0.460922149685435	0.000000000000000	0.008923562767742	0.056892490313654	0.025928369664256	0.847792998477930	Positive
V048	钱镜村委会	0.000000000000000	0.292772148157000	0.271428517142868	0.366666666666667	0.000000000000000	0.938291660133131	0.634703196347032	0.183561643835616	0.869101978691020	0.721765601217656	0.081278538812785	0.210958904109589	0.914155251141552	0.052054794520548	0.906647560942801	0.007597987490160	0.325865854726926	0.280000000000000	0.127032708807308	0.117570769840189	0.161836923210666	0.584610340244902	0.712024353120243	0.625570776255708	0.872686183486735	0.190476217687079	0.021623538843068	0.462382464605194	0.132746714472174	0.693759512937595	Positive
V049	钱厦村委会	0.036459665679625	0.105026186981000	0.266666613333344	0.433333333333333	0.500000130246503	0.798551015498309	0.673515981735160	0.385083713850837	0.898021308980213	0.918569254185693	0.086757990867580	0.356925418569254	0.873668188736682	0.092846270928463	0.974049128774456	0.022855177978672	0.477788387614057	0.750000000000000	0.046268176792896	0.125477608982738	0.115882111008833	0.388614810758937	0.805936073059361	0.704718417047184	0.669287907905070	0.211180154392196	0.052413116180489	0.701414205671257	0.475334211890994	0.866057838660578	Positive
V050	勤王村委会	0.000000000000000	0.221994544472000	0.399999920000016	0.200000000000000	0.500000130246503	0.922268029863875	0.673515981735160	0.385083713850837	0.898021308980213	0.918569254185693	0.086757990867580	0.356925418569254	0.873668188736682	0.092846270928463	0.769588075873829	0.213888253383920	0.701316775666246	0.750000000000000	0.127081162191010	0.150415270525696	0.100453897249647	0.841200431565993	0.805936073059361	0.704718417047184	0.996001761253839	0.257142893877556	0.004289125194772	0.819548011294361	0.270984005730896	0.866057838660578	Positive
V051	清水潭村委会	0.152163354706390	0.149557147532000	0.399999920000016	0.166666666666667	0.500000130246503	0.665209880984323	0.673515981735160	0.385083713850837	0.898021308980213	0.918569254185693	0.086757990867580	0.356925418569254	0.873668188736682	0.092846270928463	0.916511102566173	0.006870456300852	0.605260677500662	0.750000000000000	0.130563128474733	0.076664607445335	0.091505422456519	0.619314956800023	0.805936073059361	0.704718417047184	0.546705306300953	0.314285759183680	0.074709738566589	0.766651970702116	0.500352643783071	0.866057838660578	Positive
V052	渠南村委会	0.145920816607732	0.271873891049000	0.439999912000017	0.266666666666667	0.500000130246503	0.826245842507306	0.716133942161339	0.289954337899543	0.871385083713851	0.892694063926941	0.159817351598174	0.202435312024353	0.889649923896499	0.063926940639269	0.804758236327236	0.157870725387594	0.777533430443338	0.800000000000000	0.134840910845219	0.208411586784253	0.080449960901224	0.547458571639407	0.713089802130898	0.675038051750381	0.838356615232405	0.371428624489804	0.026405396647590	0.843280631891989	0.412523956003824	0.890410958904109	Positive
V053	三河村委会	0.000000000000000	0.139039985790000	0.266666613333344	0.466666666666667	0.685475475788854	0.693966055480059	0.753424657534247	0.341451040081178	0.921867072552003	0.874175545408423	0.163876204972094	0.219685438863522	0.835616438356164	0.087772704211059	0.903096826839456	0.003222531804617	0.573452837333762	0.733333333333333	0.055002277959822	0.057632874989707	0.111673330537595	0.675806663813319	0.834601725012685	0.670218163368849	0.616445149510428	0.242857177551025	0.098467471991876	0.685534446222772	0.406660666026120	0.874175545408423	Positive
V054	三新村委会	0.000000000000000	0.172695159774000	0.311111048888901	0.366666666666667	0.750000195369756	0.787159055111275	0.753424657534247	0.341451040081178	0.921867072552003	0.874175545408423	0.163876204972094	0.219685438863522	0.835616438356164	0.087772704211059	0.875411004140799	0.056730470398064	0.343638192678128	0.733333333333333	0.155133815807213	0.079947281508208	0.100802881580741	0.542077783434616	0.834601725012685	0.670218163368849	0.798793014576300	0.253968290249438	0.056321285760421	0.714566524749569	0.359594904636049	0.874175545408423	Positive
V055	上庄村委会	0.080737250929298	0.087009647047800	0.266666613333344	0.300000000000000	0.459148036632065	0.913068418244009	0.673515981735160	0.385083713850837	0.898021308980213	0.918569254185693	0.086757990867580	0.356925418569254	0.873668188736682	0.092846270928463	0.852062115095849	0.018915545357841	0.494834037265024	0.750000000000000	0.137703792125633	0.047911226333823	0.134625236517886	0.000000021716758	0.805936073059361	0.704718417047184	0.912953819799463	0.224489827988343	0.061260554016429	0.763974499031591	0.312722552138325	0.866057838660578	Positive
V056	十里村委会	0.000000000000000	0.201209200726000	0.266666613333344	0.433333333333333	0.000000000000000	0.763120897893119	0.716133942161339	0.289954337899543	0.871385083713851	0.892694063926941	0.159817351598174	0.202435312024353	0.889649923896499	0.063926940639269	0.789507147477459	0.345401976517539	0.744276878361631	0.800000000000000	0.171986732273906	0.167544360205748	0.132559895680707	0.781751341190019	0.713089802130898	0.675038051750381	0.957122708854778	0.204081661807584	0.035519097006007	0.840935205223677	0.334641544495387	0.890410958904109	Positive
V057	双河村委会	0.000000000000000	0.223294099295000	0.333333266666680	0.400000000000000	0.500000130246503	0.973674424491892	0.753424657534247	0.341451040081178	0.921867072552003	0.874175545408423	0.163876204972094	0.219685438863522	0.835616438356164	0.087772704211059	1.000000420662032	0.000000000000000	0.634869888136906	0.733333333333333	0.118525917345926	0.080240744901247	0.099645672576621	0.589584419566185	0.834601725012685	0.670218163368849	0.894257812482831	0.228571461224494	0.010934683908610	0.752136782850091	0.325320125803613	0.874175545408423	Positive
V058	双马村村委会	0.051362705252575	0.141302201775000	0.247058774117657	0.633333333333333	0.459148036632065	0.818550641464525	0.697108066971081	0.000000000000000	1.000000000000000	0.595129375951294	0.038051750380518	0.000000000000000	0.905631659056316	0.048706240487062	0.977381920162287	0.009390198283292	0.583276279979007	0.700000000000000	0.090641016173073	0.066014690123796	0.124623106703555	0.524989292058051	0.683409436834094	0.709284627092846	0.728141217017586	0.206349235827668	0.072621290758862	0.667374961286995	0.311142807353665	0.607305936073059	Positive
V059	双庙村委会	0.000000000000000	0.204045751657000	0.279999944000011	0.366666666666667	0.000000000000000	0.540377459484357	0.771689497716895	0.274277016742770	0.914155251141552	0.885540334855403	0.086757990867580	0.152511415525114	0.864231354642314	0.027092846270928	0.552165548162367	0.927401227940634	0.604561477295522	0.640000000000000	0.038393561400776	0.171799420725110	0.260476843126329	0.707034960902212	0.714459665144597	0.642009132420091	0.720501401849502	0.207792237476813	0.008527469902564	0.866957622157645	0.250969843076795	0.845357686453577	Positive
V060	塔院村委会	0.161106482118580	0.206989638016000	0.274999945000011	0.700000000000000	0.750000195369756	0.860951436492884	0.716133942161339	0.289954337899543	0.871385083713851	0.892694063926941	0.159817351598174	0.202435312024353	0.889649923896499	0.063926940639269	0.946021275876086	0.000000000000000	0.637822879437965	0.800000000000000	0.104693594264680	0.189794981415126	0.088558185439545	0.512273922724021	0.713089802130898	0.675038051750381	0.802772221764523	0.201680701080436	0.013114412683951	0.583566262411195	0.267501394187180	0.890410958904109	Positive
V061	太丰村委会	0.108030278261731	0.107033056444000	0.266666613333344	0.600000000000000	0.921185736550934	0.933592010287486	0.716133942161339	0.289954337899543	0.871385083713851	0.892694063926941	0.159817351598174	0.202435312024353	0.889649923896499	0.063926940639269	0.873356490302742	0.011481467204277	0.806401392749455	0.800000000000000	0.103011236093264	0.061244137256527	0.102360189485827	0.346603584026157	0.713089802130898	0.675038051750381	0.857279191782663	0.241758276295138	0.044374911790352	0.868645611262149	0.462975238233357	0.890410958904109	Positive
V062	特平村委会	0.041052267201511	0.164203154864000	0.259999948000010	0.333333333333333	0.000000000000000	0.789459973321608	0.754439370877726	0.231861998985288	0.860984271943175	0.771689497716895	0.109081684424149	0.304921359715881	0.946220192795534	0.068493150684932	0.835936563523794	0.107879916615611	0.730931424101255	0.466666666666667	0.125606613632682	0.087743119093375	0.104027597182642	0.468412883057283	0.773718924403857	0.630644342973111	0.817190388069900	0.207792237476813	0.041861261155015	0.802731381125984	0.386405455220952	0.789954337899543	Positive
V063	万福村委会	0.000000000000000	0.191372589215000	0.266666613333344	0.500000000000000	0.000000000000000	0.740914143984936	0.716133942161339	0.289954337899543	0.871385083713851	0.892694063926941	0.159817351598174	0.202435312024353	0.889649923896499	0.063926940639269	0.944467664804529	0.062049133535080	0.480983742919039	0.800000000000000	0.085670501898397	0.174671723921624	0.097529250758308	0.644613723913501	0.713089802130898	0.675038051750381	0.695970083240996	0.198412726757374	0.032491498422716	0.807493948698628	0.419825962642480	0.890410958904109	Positive
V064	吴堡村委会	0.000000000000000	0.129916867113000	0.449999910000018	0.133333333333333	0.000000000000000	0.730731746940433	0.688483003551498	0.129375951293760	0.942161339421613	0.680365296803653	0.028919330289193	0.147640791476408	0.910705225773720	0.019786910197869	0.980173544504145	0.000000000000000	0.283594982662495	0.466666666666667	0.120705290361058	0.107792995419791	0.095505924935517	0.784019391367208	0.595129375951294	0.645865043125318	0.864984688298171	0.428571489795927	0.000089197568230	0.653730218700172	0.322514840910727	0.823439878234399	Positive
V065	卸甲村委会	0.064043765062106	0.202296944066000	0.235294070588245	1.000000000000000	0.459148036632065	0.589082639654977	0.697108066971081	0.000000000000000	1.000000000000000	0.595129375951294	0.038051750380518	0.000000000000000	0.905631659056316	0.048706240487062	0.922051119664175	0.020946509488498	0.685596834638920	0.700000000000000	0.118914354775014	0.084656977012729	0.081167398142999	0.525375827034320	0.683409436834094	0.709284627092846	0.653677172012813	0.182539708616784	0.129166141964229	0.825644630959806	0.582277560504415	0.607305936073059	Positive
V066	卸甲社区居委会	0.268045570715648	0.354846653572000	0.699999860000030	0.200000000000000	0.405639167895705	0.027797881771450	0.634703196347032	0.183561643835616	0.869101978691020	0.721765601217656	0.081278538812785	0.210958904109589	0.914155251141552	0.052054794520548	0.167736484695822	0.321477315460955	0.629255328708276	0.280000000000000	0.479553477280828	0.503933865336133	0.401558488294121	0.947186478637713	0.712024353120243	0.625570776255708	0.773846446434754	0.571428653061235	0.008973436396025	0.098873694477336	0.072952635703940	0.693759512937595	Positive
V067	薛北村委会	0.000000000000000	0.112909640580000	0.274999945000011	0.300000000000000	0.000000000000000	0.478777168534146	0.634703196347032	0.183561643835616	0.869101978691020	0.721765601217656	0.081278538812785	0.210958904109589	0.914155251141552	0.052054794520548	0.941728165041677	0.000000000000000	0.509633318999525	0.280000000000000	0.051326458788163	0.040449673669104	0.048142713070937	0.222184172355352	0.712024353120243	0.625570776255708	0.308087831746034	0.253968290249438	0.148431916608778	0.569574466642744	0.617168942925748	0.693759512937595	Positive
V068	阳沟村委会	0.000000000000000	0.251097552418000	0.283333276666678	0.366666666666667	0.000000000000000	0.756602869540294	0.673515981735160	0.385083713850837	0.898021308980213	0.918569254185693	0.086757990867580	0.356925418569254	0.873668188736682	0.092846270928463	0.918145186106512	0.009977774054194	0.407011593551274	0.750000000000000	0.027324906954776	0.138625428937585	0.070781133274891	0.428287383035510	0.805936073059361	0.704718417047184	0.595853447976969	0.250000035714291	0.019636901161586	0.701126181850865	0.524687661520528	0.866057838660578	Positive
V069	杨庙社区居委会	0.193291452067723	0.000000000000000	0.000000000000000	0.000000000000000	0.000000000000000	0.109801649027090	0.753424657534247	0.341451040081178	0.921867072552003	0.874175545408423	0.163876204972094	0.219685438863522	0.835616438356164	0.087772704211059	0.105875529325079	0.113901411378412	0.000000000000000	0.733333333333333	0.966246453498246	0.418432365949185	0.283274591955028	0.979856752536572	0.834601725012685	0.670218163368849	0.786197672815234	0.000000000000000	0.002450136081405	0.000000169615556	0.058669151409574	0.874175545408423	Positive
V070	腰圩村委会	0.086492560617995	0.120895778249000	0.299999940000012	0.233333333333333	0.000000000000000	0.707512362884727	0.771689497716895	0.274277016742770	0.914155251141552	0.885540334855403	0.086757990867580	0.152511415525114	0.864231354642314	0.027092846270928	0.675057930732647	0.999999996430042	0.240683552618065	0.640000000000000	0.033753387732333	0.084506913604372	0.201614617491692	0.789740891947133	0.714459665144597	0.642009132420091	0.796449528919995	0.261904799319733	0.028264455662179	0.733209639876649	0.160542143535920	0.845357686453577	Positive
V071	一沟村委会	0.113586979101542	0.243432902296000	0.254545403636374	0.366666666666667	0.500000130246503	0.718992330884197	0.792998477929985	0.148655504819887	0.925925925925927	0.827498731608320	0.108066971080670	0.146626078132928	0.886352105530189	0.078640284119735	0.848348089354586	0.118903991899121	0.421968786639694	0.600000000000000	0.124866447958488	0.126554042116965	0.132338841138011	0.718360471774697	0.695585996955860	0.769660071029933	0.798295613677773	0.178571454081636	0.046584458017883	0.702985724698673	0.497065637745117	0.847792998477930	Positive
V072	一平村委会	0.006883108426743	0.248948306387000	0.252631528421063	0.700000000000000	0.792481456796401	0.603724344976456	0.634703196347032	0.183561643835616	0.869101978691020	0.721765601217656	0.081278538812785	0.210958904109589	0.914155251141552	0.052054794520548	0.937966619890716	0.022675331612115	0.596790144916480	0.280000000000000	0.101291402128174	0.096508366032754	0.162253118779943	0.634077548734677	0.712024353120243	0.625570776255708	0.446231072207656	0.187969951664880	0.154078369908647	0.749101228860873	0.633751415102783	0.693759512937595	Positive
V073	应龙村委会	0.000000000000000	0.200186995399000	0.299999940000012	0.400000000000000	0.000000000000000	0.796019294626677	0.771689497716895	0.274277016742770	0.914155251141552	0.885540334855403	0.086757990867580	0.152511415525114	0.864231354642314	0.027092846270928	0.847529069254828	0.022660922891548	0.449856063290761	0.640000000000000	0.087978297980221	0.115204744109689	0.083589146518984	0.470536482772534	0.714459665144597	0.642009132420091	0.760410505114986	0.207792237476813	0.019478391186254	0.682944108457572	0.233040327329443	0.845357686453577	Positive
V074	营北村村委会	0.203669142077404	0.224129204555000	0.285714228571440	0.833333333333333	0.325011295487324	0.736352693600716	0.688483003551498	0.129375951293760	0.942161339421613	0.680365296803653	0.028919330289193	0.147640791476408	0.910705225773720	0.019786910197869	0.947465223437576	0.020146596098486	0.463256988567771	0.466666666666667	0.143517117959228	0.048328193865999	0.135168379929467	0.690498533346987	0.595129375951294	0.645865043125318	0.761028403439030	0.201298730055663	0.026233064264756	0.561763168481537	0.153725918314639	0.823439878234399	Positive
V075	营东村委会	0.123539056146016	0.099065812850900	0.366666593333348	0.266666666666667	0.459148036632065	0.698870243955394	0.688483003551498	0.129375951293760	0.942161339421613	0.680365296803653	0.028919330289193	0.147640791476408	0.910705225773720	0.019786910197869	0.984361557916779	0.012265390981262	0.474402927184908	0.466666666666667	0.113253017859849	0.039947620679637	0.074495411471881	0.570618201255927	0.595129375951294	0.645865043125318	0.678105469288063	0.333333380952388	0.024466001247778	0.447429472987434	0.128233787357949	0.823439878234399	Positive
V076	营南村委会	0.011813857098906	0.242896184715000	0.381818105454561	0.333333333333333	0.000000000000000	0.745378646524221	0.688483003551498	0.129375951293760	0.942161339421613	0.680365296803653	0.028919330289193	0.147640791476408	0.910705225773720	0.019786910197869	0.903277925482051	0.000000000000000	0.070144761406752	0.466666666666667	0.115711656811378	0.041842562133391	0.098172319030262	0.797939745756437	0.595129375951294	0.645865043125318	0.612025626923755	0.298701341372919	0.026776419665266	0.443168503621350	0.129708233749764	0.823439878234399	Positive
V077	营南社区居委会	0.000000000000000	1.000000009300000	0.000000000000000	0.066666666666667	0.000000000000000	0.064282607418677	0.792998477929985	0.148655504819887	0.925925925925927	0.827498731608320	0.108066971080670	0.146626078132928	0.886352105530189	0.078640284119735	0.472799807457659	0.000000000000000	0.582320148641917	0.600000000000000	0.815516313640954	0.999999998256584	0.000000000000000	0.946286032472132	0.695585996955860	0.769660071029933	0.939512250596158	0.857142979591854	0.020026892009074	0.217645965702628	0.149607712406446	0.847792998477930	Positive
V078	营西村委会	0.170768401283515	0.244876825411000	0.339999932000014	0.433333333333333	0.960964297768092	0.594063995560308	0.753424657534247	0.341451040081178	0.921867072552003	0.874175545408423	0.163876204972094	0.219685438863522	0.835616438356164	0.087772704211059	0.896701457307048	0.000000000000000	0.262502185086768	0.733333333333333	0.136516980834501	0.123964102227256	0.075138572025918	0.623896973449018	0.834601725012685	0.670218163368849	0.352660682588488	0.259740296846016	0.062689324882966	0.577337763744902	0.245746746092423	0.874175545408423	Positive
V079	永安村委会	0.139794210565569	0.150865931965000	0.311111048888901	0.333333333333333	0.500000130246503	0.579652912433826	0.716133942161339	0.289954337899543	0.871385083713851	0.892694063926941	0.159817351598174	0.202435312024353	0.889649923896499	0.063926940639269	0.854300744001679	0.046376654138915	0.513784966657303	0.800000000000000	0.143771505910619	0.147188446297266	0.174109108936143	0.613939998596968	0.713089802130898	0.675038051750381	0.544873085753838	0.253968290249438	0.046750436504888	0.781058279343388	0.297248209995209	0.890410958904109	Positive
V080	俞胡村委会	0.087260372245335	0.149154890166000	0.266666613333344	0.500000000000000	0.750000195369756	0.632401913068821	0.697108066971081	0.000000000000000	1.000000000000000	0.595129375951294	0.038051750380518	0.000000000000000	0.905631659056316	0.048706240487062	0.963601201724508	0.000000000000000	0.644312729459428	0.700000000000000	0.088390471086376	0.072220916115490	0.076216714554637	0.575317720709658	0.683409436834094	0.709284627092846	0.531683079783949	0.200000028571433	0.044507883167161	0.723398881335278	0.654901202770089	0.607305936073059	Positive
V081	闸河村委会	0.086405383008353	0.150730989463000	0.279999944000011	0.600000000000000	0.459148036632065	0.893088664900658	0.673515981735160	0.385083713850837	0.898021308980213	0.918569254185693	0.086757990867580	0.356925418569254	0.873668188736682	0.092846270928463	0.897950649133344	0.000000000000000	0.684484443564915	0.750000000000000	0.113632312561439	0.051758969854878	0.102739193846153	0.155825612365647	0.805936073059361	0.704718417047184	0.878355879157921	0.207142886734698	0.083430021119092	0.729661508050085	0.342779315487126	0.866057838660578	Positive
V082	张余村委会	0.150683909689821	0.113679308947000	0.333333266666680	0.366666666666667	0.405639167895705	0.570456366214582	0.753424657534247	0.341451040081178	0.921867072552003	0.874175545408423	0.163876204972094	0.219685438863522	0.835616438356164	0.087772704211059	0.789141590887689	0.202970114684453	0.669119469439910	0.733333333333333	0.103305507279139	0.124170387542103	0.171792888126212	0.768755314112606	0.834601725012685	0.670218163368849	0.622309470387010	0.285714326530618	0.184941612305600	0.906557989330901	0.469397387449451	0.874175545408423	Positive
V083	长宁村委会	0.000000000000000	0.136913534282000	0.279999944000011	0.533333333333333	0.459148036632065	0.646359999123016	0.754439370877726	0.231861998985288	0.860984271943175	0.771689497716895	0.109081684424149	0.304921359715881	0.946220192795534	0.068493150684932	0.949004173652216	0.000000000000000	0.351093338974554	0.466666666666667	0.061237448839918	0.013890359751810	0.058519667022380	0.518809958513119	0.773718924403857	0.630644342973111	0.485340011976799	0.235294151260509	0.078896004505658	0.649858109520163	0.588531046752161	0.789954337899543	Positive
V084	志光村委会	0.107540008180309	0.060302801281800	0.999999800000042	0.033333333333333	0.000000000000000	0.720031441595360	0.754439370877726	0.231861998985288	0.860984271943175	0.771689497716895	0.109081684424149	0.304921359715881	0.946220192795534	0.068493150684932	0.815378047861800	0.006659773556506	0.519593585465093	0.466666666666667	0.112565219981595	0.128597141268947	0.144738008807381	0.808158167646592	0.773718924403857	0.630644342973111	0.588875670640339	1.000000142857162	0.101484130778750	0.706218342744602	0.445661282075641	0.789954337899543	Positive
V085	周邶墩村委会	0.039986040765424	0.177956159097000	0.263157842105274	0.766666666666667	0.685475475788854	0.837700886695206	0.753424657534247	0.341451040081178	0.921867072552003	0.874175545408423	0.163876204972094	0.219685438863522	0.835616438356164	0.087772704211059	0.808079167125854	0.158222468186847	0.623764259756295	0.733333333333333	0.174334713314234	0.093514114563435	0.164578594793356	0.731946071435150	0.834601725012685	0.670218163368849	0.903717274445962	0.210526345864666	0.029051320515291	0.718288726112565	0.268296249826124	0.874175545408423	Positive
V086	周巷村村委会	0.000000000000000	0.014249135079500	0.499999900000020	0.100000000000000	0.500000130246503	0.439361033535414	0.697108066971081	0.000000000000000	1.000000000000000	0.595129375951294	0.038051750380518	0.000000000000000	0.905631659056316	0.048706240487062	0.907390223927864	0.009239070367064	0.464211150469069	0.700000000000000	0.053891235042120	0.049463853457283	0.063665144340911	0.334029852404240	0.683409436834094	0.709284627092846	0.310880199681742	0.500000071428583	0.789086760879587	0.726773272935979	0.592807054828351	0.607305936073059	Positive
V087	周巷社区居委会	0.389818070203203	0.386884425350000	0.000000000000000	0.000000000000000	0.000000000000000	0.201534671226823	0.634703196347032	0.183561643835616	0.869101978691020	0.721765601217656	0.081278538812785	0.210958904109589	0.914155251141552	0.052054794520548	0.293253276164864	0.148915617441739	0.625140825281495	0.280000000000000	0.739412943392208	0.780255559602645	0.234978959179805	0.771567242887414	0.712024353120243	0.625570776255708	0.881766148194829	0.000000000000000	0.012984476385950	0.226530990540294	0.150463274634010	0.693759512937595	Positive
V088	砖场村委会	0.238552324866409	0.227239036805000	0.299999940000012	0.600000000000000	0.959148166878570	0.731842533143992	0.771689497716895	0.274277016742770	0.914155251141552	0.885540334855403	0.086757990867580	0.152511415525114	0.864231354642314	0.027092846270928	0.737829718299786	0.158317692252618	0.341834481760435	0.640000000000000	0.165400687770594	0.051162364718506	0.135912255502568	0.743711803987759	0.714459665144597	0.642009132420091	0.918461093560119	0.219780251177399	0.089330111124200	0.747973164929095	0.194278171309796	0.845357686453577	Positive
V089	子婴村委会	0.047458997378291	0.143984946997000	0.272727218181829	0.400000000000000	0.500000130246503	0.652013916729836	0.673515981735160	0.385083713850837	0.898021308980213	0.918569254185693	0.086757990867580	0.356925418569254	0.873668188736682	0.092846270928463	0.993818755815771	0.054283738000315	0.694329045045389	0.750000000000000	0.108640716521533	0.088494563984404	0.100925014319485	0.377372295060150	0.805936073059361	0.704718417047184	0.590389331361471	0.246753282003716	0.088853769470526	0.830586688125994	0.427568473255799	0.866057838660578	Positive

## Sheet: Raw_objective_indicators
Raw_objective_indicators — supplementary raw materials
Village_ID	Village_name	Main_canal_density_raw	Branch_canal_density_raw	Canal_network_connectivity_raw	Heritage_element_agglomeration_raw	Heritage_element_diversity_raw	Irrigated_area_proportion_raw	Farmland_proportion_raw	Nighttime_light_proxy_raw	Rural_economic_diversity_raw	Village_density_raw	Road_density_raw	Population_density_raw	Public_service_proximity_raw	NDVI_raw	Water_system_connectivity_raw	Water_area_density_raw	Landscape_diversity_raw	Ecological_land_proportion_raw
V001	八桥社区居委会	0.405726883166163	0.320840931168000	0.000000000000000	0.100000000000000	0.500000130246503	0.110782747829393	0.187746576626974	0.256229524734945	0.614227347111511	0.495074918385358	0.521347087348358	0.581795339768335	0.934867524179262	0.733150009282481	0.000000000000000	0.004965651113809	0.615548785118098	0.115112885755331
V002	保安村委会	0.000000000000000	0.188655391568000	0.271428517142868	0.533333333333333	0.000000000000000	0.256223991568258	0.983494317526168	0.000000000000000	0.379810622454736	0.060400235996086	0.082154407040417	0.072828575506569	0.264182857318538	0.196852771795770	0.220779252319114	0.209084605924612	0.492307286066054	0.999999797413207
V003	保丰村委会	0.188774065473790	0.059791361979400	0.466666573333352	0.233333333333333	1.000000260493005	0.989064876617517	0.920448989332660	0.067782330310411	0.450146216530606	0.143408651088554	0.079842351880053	0.141505095428115	0.640872794738147	0.929570067240249	0.476190544217696	0.029100255134054	0.630163249632411	0.198968898489711
V004	北太平村委会	0.000000000000000	0.028958595544300	0.000000000000000	0.033333333333333	0.000000000000000	0.718204725808389	0.943071229218972	0.000000000000000	0.531915332744591	0.096840294855922	0.074339642375265	0.054464299116697	0.456242984947912	0.561151660614747	0.428571489795927	0.004926625840830	0.822597262766535	0.578674270991351
V005	伯勤村委会	0.000000000000000	0.132127148329000	0.244444395555565	0.433333333333333	0.750000195369756	0.851806659820015	0.910444234750562	0.000000000000000	0.558807373042811	0.104972430972693	0.055172598011888	0.084453899942058	0.642985489223396	0.688795291002853	0.178571454081636	0.008430401302447	0.683845309826821	0.396230065750337
V006	伯勤社区居委会	0.000000000000000	0.000000000000000	0.000000000000000	0.033333333333333	0.000000000000000	0.296688976490177	0.448276476131121	0.054839547229269	0.712222870213574	0.592884686181141	0.118302891283858	0.000000000000000	0.782313887672417	0.869514378694250	0.000000000000000	0.002877226782506	0.639671591408292	0.141455567197033
V007	昌农村委会	0.000000000000000	0.192593094566000	0.288888831111122	0.333333333333333	0.500000130246503	0.595917183322673	0.904311443208369	0.059709129299439	0.710467889099104	0.125482266456018	0.120886096875677	0.148797229555414	0.631714773524560	0.589906992291199	0.218487426170472	0.021785575575740	0.737177627622005	0.589697502040130
V008	朝阳社区居委会	0.296023035503154	0.000000000000000	0.000000000000000	0.066666666666667	0.500000130246503	0.000000000000000	0.000000341142673	0.278138918908787	0.665031708690951	0.711076982424976	0.313824487728134	0.575964310318865	0.991217649989971	0.287904154020918	0.000000000000000	0.020155255077495	0.040061927292872	0.000000000000000
V009	车逻村委会	0.334465228504254	0.046031541771600	0.399999920000016	0.166666666666667	0.750000195369756	0.765744901874912	0.684582718572708	0.247425626156069	0.660935425403875	0.272013536931182	0.220595126753664	0.305635846034410	0.824425132331789	0.852259089341686	0.333333380952388	0.007264319741304	0.828494760593546	0.253158369623400
V010	陈堡村委会	0.000000000000000	0.030407072324800	0.399999920000016	0.200000000000000	0.750000195369756	0.645148612094454	0.929628878831770	0.070143207055721	0.696221410298737	0.071816874503945	0.069763649858765	0.090860756881844	0.663528754623967	0.701845057626888	0.207792237476813	0.285674637654167	0.887097870668687	0.558754598401124
V011	陈甸村委会	0.000000000000000	0.000000000000000	0.000000000000000	0.000000000000000	0.000000000000000	0.271737205132178	0.804024136787617	0.000000000000000	0.527755588501670	0.040260324576111	0.048544288489249	0.056423218104180	0.156331721325285	0.000000005184259	0.214285744897964	0.999999999999975	0.541136630564956	0.320343098853088
V012	大庵村委会	0.045197196396895	0.135729676437000	0.279999944000011	0.433333333333333	0.500000130246503	0.874144247494503	0.989206813960571	0.014122748013152	0.377589273331504	0.081648868503908	0.054440554514548	0.075345869677426	0.419438055410076	0.893802012386726	0.208791238618529	0.091654468701935	0.598496359593052	0.314762214070181
V013	大昌村委会	0.171657243817226	0.196700028077000	0.261538409230780	0.500000000000000	0.459148036632065	0.812214027583287	0.908345068808141	0.000000000000000	0.591848103493695	0.128728377822224	0.082500101780763	0.122794612983805	0.559924362801032	0.864496272559441	0.186813213500789	0.017333642281152	0.558485294505465	0.179256938178516
V014	大卢村委会	0.000000000000000	0.198619504404000	0.257142805714296	0.466666666666667	0.000000000000000	0.543524314952821	0.957014145541533	0.000000000000000	0.584690600214699	0.054251907285116	0.077583454954384	0.068887762443776	0.356088365762959	0.243428761990220	0.190476217687079	0.140596478153459	0.617917698555166	0.752027290631843
V015	大树庵村委会	0.142900458416327	0.168963034883000	0.399999920000016	0.233333333333333	0.500000130246503	0.614493657605883	0.826630983096932	0.021881766401157	0.422458838579680	0.093878333569248	0.040428233850966	0.145618301124181	0.520305299706059	0.595605937482008	0.285714326530618	0.034065560063270	0.738827905042335	0.689602945049539
V016	灯塔村委会	0.209259582805295	0.158803127512000	0.266666613333344	0.266666666666667	0.500000130246503	0.731273935863124	0.875979685783292	0.207750372038136	0.454283289880817	0.152225134625530	0.021232488023075	0.146017270606965	0.756844762551368	0.824674304304654	0.222222253968258	0.031218613400362	0.775991783054022	0.345710967844494
V017	狄奔村委会	0.000000000000000	0.100266000108000	0.299999940000012	0.166666666666667	0.000000000000000	0.838569569891061	0.961995607917819	0.012594372498465	0.429752727276023	0.092613408294558	0.126729519020050	0.065104515687335	0.576386995117776	0.751575209399775	0.250000035714291	0.017598651502963	0.662514898902677	0.340270169201112
V018	东墩社区居委会	0.000000000000000	0.129380360379000	0.333333266666680	0.233333333333333	0.000000000000000	0.774835331554543	0.901172825677471	0.217835488982091	0.642060489078500	0.134339308727231	0.182190351520382	0.167396267071958	0.768802730588303	0.804755588356772	0.357142908163272	0.043799463717546	0.659171285394819	0.248896219741693
V019	东湖村委会	0.000000000000000	0.172165117267000	0.371428497142872	0.300000000000000	0.500000130246503	0.534556510187150	0.832921022723296	0.045170631889188	0.799117535390787	0.058230284724317	0.166520599787745	0.074996309821974	0.325973304457862	0.248388089721114	0.220238126700685	0.151742884609470	0.954625762493932	0.815270100088746
V020	二沟社区居委会	0.144850228800589	0.159542102572000	0.439999912000017	0.266666666666667	0.792481456796401	0.378219725289682	0.883129418086435	0.000000000000000	0.621559142171127	0.161603066839999	0.137453506211762	0.164149273407517	0.771529767629513	0.282432364151705	0.428571489795927	0.027777293954476	0.798921506779970	0.724611530881254
V021	佛塔村委会	0.000000000000000	0.156515512809000	0.349999930000014	0.100000000000000	0.000000000000000	0.553199998080957	0.633097149382155	0.907650759489857	0.736341453090032	0.000000218296373	0.372201295938793	0.170120499152725	0.488255186436665	0.737173028601625	0.285714326530618	0.006270235197886	0.999999950211335	0.509124886527259
V022	管伙村委会	0.183414390198347	0.140332016005000	0.299999940000012	0.400000000000000	0.500000130246503	0.602975244506937	0.657702098709877	0.586103233907404	0.618119764823789	0.148462973773280	0.099871898624158	0.247402192857215	0.776223835005863	0.819864725368477	0.220779252319114	0.008877248857467	0.868555541782689	0.267730107390249
V023	郭楼村委会	0.033047379817316	0.294565209340000	0.272727218181829	0.833333333333333	0.750000195369756	0.650307020759625	0.953585872790895	0.029487398141832	0.665280518049912	0.098925828492836	0.080381771389080	0.093163310209126	0.456342483102873	0.501764365120044	0.198757792369126	0.105506470926993	0.732363643099704	0.542972704945030
V024	果林社区居委会	0.000000000000000	0.046542013972800	0.000000000000000	0.033333333333333	0.000000000000000	0.790410948521891	0.997549630428247	0.000000000000000	0.950314768938707	0.121820264409849	0.000000000000000	0.052643054637756	0.440567128353603	0.980906340956754	0.000000000000000	0.009628180182804	0.514956397711929	0.115425327416467
V025	恒丰村委会	0.000000000000000	0.059234096751700	0.399999920000016	0.166666666666667	0.000000000000000	0.957438625482792	0.954098492328202	0.145535256287238	0.449192495035474	0.162333791697416	0.086570892292055	0.116379240519975	0.656876160469764	0.952934396283360	0.265306160349860	0.020570458439277	0.702998911658927	0.256389259707780
V026	花阳村委会	0.000000000000000	0.079148682069600	0.288888831111122	0.433333333333333	0.792481456796401	0.825624473826685	0.990381422433956	0.000000000000000	0.510874320791083	0.085884617196547	0.074082344167721	0.072700200427763	0.626887324511357	0.739065799065615	0.202380981292521	0.153578386074466	0.663364155177266	0.411831882679952
V027	剑鸣村委会	0.000000000000000	0.095630553572900	0.259999948000010	0.366666666666667	0.500000130246503	0.439206602284366	0.923719734333247	0.000000000000000	0.625419024934644	0.070405779412550	0.056355192033162	0.052829611289258	0.279797688245330	0.260388321189092	0.181818207792211	0.095201116085181	0.604543137175453	0.793974423193196
V028	界首村委会	0.253877485924452	0.214574336975000	0.599999880000024	0.300000000000000	0.685475475788854	0.089548902341897	0.424618440473628	0.158909363565839	0.682868029273363	0.198331315026821	0.385712720847155	0.437602716542382	0.937462552176605	0.421621018949812	0.476190544217696	0.022848671328631	0.840302225630593	0.351323553872668
V029	金港村委会	0.113954625281805	0.141873074630000	0.259999948000010	0.300000000000000	0.500000130246503	0.824557230815955	0.801536164192434	0.019303000258731	0.952053051553539	0.106331471612020	0.112401932911887	0.165256868008612	0.642453007232679	0.914618996295582	0.200000028571433	0.053625655117683	0.948932519216378	0.357119093865739
V030	金沟村委会	0.000000000000000	0.058355644225200	0.399999920000016	0.300000000000000	0.459148036632065	1.000000003022074	0.951415941905265	0.028942943551857	0.386377390215017	0.141873367426795	0.060632407026397	0.086698081453123	0.527292665095232	1.000000007710904	0.333333380952388	0.048683826510564	0.685733644800212	0.225036433849836
V031	金家村委会	0.050271680518175	0.093464341176300	0.259999948000010	0.500000000000000	0.960964297768092	0.763549281439611	0.891337409991735	0.066395996462402	0.552011263361534	0.112046173067018	0.042958048811032	0.112903746442806	0.599203839849451	0.726985341879533	0.285714326530618	0.054312536198693	0.798626154217749	0.392645173842209
V032	金塘社区居委会	0.114577095760332	0.294183091592000	0.266666613333344	0.433333333333333	0.500000130246503	0.486386639246623	0.774870657795044	0.129530704535796	1.000000104724341	0.161707365498777	0.166520995886531	0.170141405455825	0.715563124765839	0.494909840834424	0.238095272108849	0.077270419516132	0.994989461114423	0.736861608885824
V033	老人桥村委会	0.000000000000000	0.183768267782000	0.266666613333344	0.533333333333333	0.792481456796401	0.742311995372856	0.977336337761243	0.001769053547509	0.727704522913747	0.100550479602427	0.219629868940474	0.075295988841508	0.425793664989194	0.619187827993340	0.219047650340140	0.009715437695324	0.700176525624021	0.397884852430289
V034	六安村委会	0.110410802066519	0.235783867777000	0.242857094285724	0.433333333333333	0.500000130246503	0.717497484449625	0.951314968759229	0.000000000000000	0.070144761406752	0.115711656811378	0.113939862834483	0.103607373795430	0.445488177454184	0.694354032027178	0.193877578717205	0.009244782631483	0.443168503621350	0.129708233749764
V035	龙奔村委会	0.078826186690673	0.136655821013000	0.224999955000009	0.533333333333333	0.500000130246503	0.853454963110073	0.927503507658686	0.011924156767435	0.449739681621019	0.140381486958533	0.067958600609238	0.109886184604071	0.672835397460804	0.830333179956704	0.184873975990400	0.033449137573287	0.655569989536685	0.299598634655943
V036	龙奔社区居委会	0.000000000000000	0.000000000000000	0.000000000000000	0.000000000000000	0.000000000000000	0.408281460714924	0.349274654250374	0.160967643284345	0.482286496340238	0.665354604729516	0.145187398370941	0.000000000000000	0.900065992244269	0.669287907905070	0.000000000000000	0.000000000000000	0.597359652555475	0.075707716004614
V037	龙华村委会	0.131741419052018	0.017482508010100	0.599999880000024	0.100000000000000	0.500000130246503	0.639616629665654	0.969878949382224	0.004842396900194	0.680920891077534	0.101652250350509	0.061586847367546	0.093054496143315	0.747324157207835	0.529092834613160	0.464285780612253	0.087853144881835	0.718581323688972	0.568827129784186
V038	龙虬社区居委会	0.258194106437452	0.287015667733000	0.000000000000000	0.066666666666667	0.500000130246503	0.261763421187882	0.233610982826223	0.167891832077996	0.872051688015316	0.263765969835210	0.608582164623402	0.941868283977640	0.972708066483144	0.093026357828893	0.000000000000000	0.027632950462230	0.876332119511793	0.556101556451352
V039	龙虬庄村委会	0.310852335160926	0.029806477253700	0.449999910000018	0.133333333333333	0.000000000000000	0.479404094736022	0.670772979522614	0.225060119666648	0.522213299465885	0.189991402626853	0.166447479990243	0.166297747864497	0.840413948138279	0.542713682966166	0.428571489795927	0.131735002164368	0.822189695347393	0.445629780900742
V040	龙胜村委会	0.060127540705292	0.030040441923100	0.799999840000030	0.066666666666667	0.500000130246503	0.394743093634949	0.899681444809975	0.000000000000000	0.445934862790176	0.055996752797618	0.029998635024066	0.047873979773993	0.603736908383580	0.223780072034258	0.306122492711376	0.097756718104978	0.606157951172149	0.843096871892892
V041	龙潭村委会	0.178400227250835	0.063072665699600	0.599999880000024	0.100000000000000	0.000000000000000	0.405245449348093	0.885783494706806	0.139633243939412	0.660376007303001	0.078615965119748	0.170192906916653	0.104644195134953	0.453678974049511	0.357638876028457	0.321428617346945	0.062657744662534	0.735110984399569	0.786190020752398
V042	龙腾村委会	0.015748199495347	0.095933228435900	0.371428497142872	0.300000000000000	0.000000000000000	0.588442464466549	0.907042526495440	0.019112762040431	0.578416873612388	0.084950648085816	0.113037466338849	0.081732488929717	0.673218465596965	0.489735227189244	0.272727311688317	0.048530852970427	0.670750180656432	0.648119382906849
V043	龙翔村委会	0.060440958542174	0.164077325214000	0.266666613333344	0.466666666666667	0.405639167895705	0.773398970731577	0.804435104558591	0.036083214690261	0.454693308888859	0.119887788645750	0.158578027938314	0.115037585881310	0.442726991690831	0.821736167368910	0.214285744897964	0.072554231238833	0.733658728111924	0.257890689331376
V044	茆吴村委会	0.180624884998331	0.278278737669000	0.253333282666677	0.633333333333333	0.405639167895705	0.551461008429257	0.738224730445575	0.054203045367882	0.499873885625743	0.102284997180827	0.102848096467288	0.114497239137791	0.772392243352368	0.645901786273904	0.201680701080436	0.085041965915652	0.829517223752618	0.481254637650064
V045	南丰村委会	0.108235084436713	0.354890459731000	0.227586161379319	0.966666666666667	0.405639167895705	0.540010095346769	0.827104483078438	0.001626348026024	0.447594441878516	0.100519075663100	0.045251685829893	0.097278455090525	0.547855781688014	0.355654032251557	0.185714312244902	0.051556054722530	0.685173997671356	0.731411739274221
V046	潘阳村委会	0.042135619928311	0.123182024732000	0.288888831111122	0.400000000000000	0.459148036632065	0.713777983165589	0.919311304369971	0.001955159741510	0.499495733690968	0.105815264464689	0.070585457519447	0.116037145385788	0.602584400642579	0.619263966179211	0.269841308390028	0.064571383491588	0.671905107725672	0.407703919147061
V047	甓湖社区居委会	0.999999999858990	0.000000000000000	0.000000000000000	0.066666666666667	0.500000130246503	0.000631764820204	0.070920000029344	0.245881283305629	0.936776005736022	0.999999157932281	0.447250444351335	0.999999999874289	1.000000037981214	0.460922149685435	0.000000000000000	0.008923562767742	0.056892490313654	0.025928369664256
V048	钱镜村委会	0.000000000000000	0.292772148157000	0.271428517142868	0.366666666666667	0.000000000000000	0.938291660133131	0.906647560942801	0.007597987490160	0.325865854726926	0.127032708807308	0.117570769840189	0.161836923210666	0.584610340244902	0.872686183486735	0.190476217687079	0.021623538843068	0.462382464605194	0.132746714472174
V049	钱厦村委会	0.036459665679625	0.105026186981000	0.266666613333344	0.433333333333333	0.500000130246503	0.798551015498309	0.974049128774456	0.022855177978672	0.477788387614057	0.046268176792896	0.125477608982738	0.115882111008833	0.388614810758937	0.669287907905070	0.211180154392196	0.052413116180489	0.701414205671257	0.475334211890994
V050	勤王村委会	0.000000000000000	0.221994544472000	0.399999920000016	0.200000000000000	0.500000130246503	0.922268029863875	0.769588075873829	0.213888253383920	0.701316775666246	0.127081162191010	0.150415270525696	0.100453897249647	0.841200431565993	0.996001761253839	0.257142893877556	0.004289125194772	0.819548011294361	0.270984005730896
V051	清水潭村委会	0.152163354706390	0.149557147532000	0.399999920000016	0.166666666666667	0.500000130246503	0.665209880984323	0.916511102566173	0.006870456300852	0.605260677500662	0.130563128474733	0.076664607445335	0.091505422456519	0.619314956800023	0.546705306300953	0.314285759183680	0.074709738566589	0.766651970702116	0.500352643783071
V052	渠南村委会	0.145920816607732	0.271873891049000	0.439999912000017	0.266666666666667	0.500000130246503	0.826245842507306	0.804758236327236	0.157870725387594	0.777533430443338	0.134840910845219	0.208411586784253	0.080449960901224	0.547458571639407	0.838356615232405	0.371428624489804	0.026405396647590	0.843280631891989	0.412523956003824
V053	三河村委会	0.000000000000000	0.139039985790000	0.266666613333344	0.466666666666667	0.685475475788854	0.693966055480059	0.903096826839456	0.003222531804617	0.573452837333762	0.055002277959822	0.057632874989707	0.111673330537595	0.675806663813319	0.616445149510428	0.242857177551025	0.098467471991876	0.685534446222772	0.406660666026120
V054	三新村委会	0.000000000000000	0.172695159774000	0.311111048888901	0.366666666666667	0.750000195369756	0.787159055111275	0.875411004140799	0.056730470398064	0.343638192678128	0.155133815807213	0.079947281508208	0.100802881580741	0.542077783434616	0.798793014576300	0.253968290249438	0.056321285760421	0.714566524749569	0.359594904636049
V055	上庄村委会	0.080737250929298	0.087009647047800	0.266666613333344	0.300000000000000	0.459148036632065	0.913068418244009	0.852062115095849	0.018915545357841	0.494834037265024	0.137703792125633	0.047911226333823	0.134625236517886	0.000000021716758	0.912953819799463	0.224489827988343	0.061260554016429	0.763974499031591	0.312722552138325
V056	十里村委会	0.000000000000000	0.201209200726000	0.266666613333344	0.433333333333333	0.000000000000000	0.763120897893119	0.789507147477459	0.345401976517539	0.744276878361631	0.171986732273906	0.167544360205748	0.132559895680707	0.781751341190019	0.957122708854778	0.204081661807584	0.035519097006007	0.840935205223677	0.334641544495387
V057	双河村委会	0.000000000000000	0.223294099295000	0.333333266666680	0.400000000000000	0.500000130246503	0.973674424491892	1.000000420662032	0.000000000000000	0.634869888136906	0.118525917345926	0.080240744901247	0.099645672576621	0.589584419566185	0.894257812482831	0.228571461224494	0.010934683908610	0.752136782850091	0.325320125803613
V058	双马村村委会	0.051362705252575	0.141302201775000	0.247058774117657	0.633333333333333	0.459148036632065	0.818550641464525	0.977381920162287	0.009390198283292	0.583276279979007	0.090641016173073	0.066014690123796	0.124623106703555	0.524989292058051	0.728141217017586	0.206349235827668	0.072621290758862	0.667374961286995	0.311142807353665
V059	双庙村委会	0.000000000000000	0.204045751657000	0.279999944000011	0.366666666666667	0.000000000000000	0.540377459484357	0.552165548162367	0.927401227940634	0.604561477295522	0.038393561400776	0.171799420725110	0.260476843126329	0.707034960902212	0.720501401849502	0.207792237476813	0.008527469902564	0.866957622157645	0.250969843076795
V060	塔院村委会	0.161106482118580	0.206989638016000	0.274999945000011	0.700000000000000	0.750000195369756	0.860951436492884	0.946021275876086	0.000000000000000	0.637822879437965	0.104693594264680	0.189794981415126	0.088558185439545	0.512273922724021	0.802772221764523	0.201680701080436	0.013114412683951	0.583566262411195	0.267501394187180
V061	太丰村委会	0.108030278261731	0.107033056444000	0.266666613333344	0.600000000000000	0.921185736550934	0.933592010287486	0.873356490302742	0.011481467204277	0.806401392749455	0.103011236093264	0.061244137256527	0.102360189485827	0.346603584026157	0.857279191782663	0.241758276295138	0.044374911790352	0.868645611262149	0.462975238233357
V062	特平村委会	0.041052267201511	0.164203154864000	0.259999948000010	0.333333333333333	0.000000000000000	0.789459973321608	0.835936563523794	0.107879916615611	0.730931424101255	0.125606613632682	0.087743119093375	0.104027597182642	0.468412883057283	0.817190388069900	0.207792237476813	0.041861261155015	0.802731381125984	0.386405455220952
V063	万福村委会	0.000000000000000	0.191372589215000	0.266666613333344	0.500000000000000	0.000000000000000	0.740914143984936	0.944467664804529	0.062049133535080	0.480983742919039	0.085670501898397	0.174671723921624	0.097529250758308	0.644613723913501	0.695970083240996	0.198412726757374	0.032491498422716	0.807493948698628	0.419825962642480
V064	吴堡村委会	0.000000000000000	0.129916867113000	0.449999910000018	0.133333333333333	0.000000000000000	0.730731746940433	0.980173544504145	0.000000000000000	0.283594982662495	0.120705290361058	0.107792995419791	0.095505924935517	0.784019391367208	0.864984688298171	0.428571489795927	0.000089197568230	0.653730218700172	0.322514840910727
V065	卸甲村委会	0.064043765062106	0.202296944066000	0.235294070588245	1.000000000000000	0.459148036632065	0.589082639654977	0.922051119664175	0.020946509488498	0.685596834638920	0.118914354775014	0.084656977012729	0.081167398142999	0.525375827034320	0.653677172012813	0.182539708616784	0.129166141964229	0.825644630959806	0.582277560504415
V066	卸甲社区居委会	0.268045570715648	0.354846653572000	0.699999860000030	0.200000000000000	0.405639167895705	0.027797881771450	0.167736484695822	0.321477315460955	0.629255328708276	0.479553477280828	0.503933865336133	0.401558488294121	0.947186478637713	0.773846446434754	0.571428653061235	0.008973436396025	0.098873694477336	0.072952635703940
V067	薛北村委会	0.000000000000000	0.112909640580000	0.274999945000011	0.300000000000000	0.000000000000000	0.478777168534146	0.941728165041677	0.000000000000000	0.509633318999525	0.051326458788163	0.040449673669104	0.048142713070937	0.222184172355352	0.308087831746034	0.253968290249438	0.148431916608778	0.569574466642744	0.617168942925748
V068	阳沟村委会	0.000000000000000	0.251097552418000	0.283333276666678	0.366666666666667	0.000000000000000	0.756602869540294	0.918145186106512	0.009977774054194	0.407011593551274	0.027324906954776	0.138625428937585	0.070781133274891	0.428287383035510	0.595853447976969	0.250000035714291	0.019636901161586	0.701126181850865	0.524687661520528
V069	杨庙社区居委会	0.193291452067723	0.000000000000000	0.000000000000000	0.000000000000000	0.000000000000000	0.109801649027090	0.105875529325079	0.113901411378412	0.000000000000000	0.966246453498246	0.418432365949185	0.283274591955028	0.979856752536572	0.786197672815234	0.000000000000000	0.002450136081405	0.000000169615556	0.058669151409574
V070	腰圩村委会	0.086492560617995	0.120895778249000	0.299999940000012	0.233333333333333	0.000000000000000	0.707512362884727	0.675057930732647	0.999999996430042	0.240683552618065	0.033753387732333	0.084506913604372	0.201614617491692	0.789740891947133	0.796449528919995	0.261904799319733	0.028264455662179	0.733209639876649	0.160542143535920
V071	一沟村委会	0.113586979101542	0.243432902296000	0.254545403636374	0.366666666666667	0.500000130246503	0.718992330884197	0.848348089354586	0.118903991899121	0.421968786639694	0.124866447958488	0.126554042116965	0.132338841138011	0.718360471774697	0.798295613677773	0.178571454081636	0.046584458017883	0.702985724698673	0.497065637745117
V072	一平村委会	0.006883108426743	0.248948306387000	0.252631528421063	0.700000000000000	0.792481456796401	0.603724344976456	0.937966619890716	0.022675331612115	0.596790144916480	0.101291402128174	0.096508366032754	0.162253118779943	0.634077548734677	0.446231072207656	0.187969951664880	0.154078369908647	0.749101228860873	0.633751415102783
V073	应龙村委会	0.000000000000000	0.200186995399000	0.299999940000012	0.400000000000000	0.000000000000000	0.796019294626677	0.847529069254828	0.022660922891548	0.449856063290761	0.087978297980221	0.115204744109689	0.083589146518984	0.470536482772534	0.760410505114986	0.207792237476813	0.019478391186254	0.682944108457572	0.233040327329443
V074	营北村村委会	0.203669142077404	0.224129204555000	0.285714228571440	0.833333333333333	0.325011295487324	0.736352693600716	0.947465223437576	0.020146596098486	0.463256988567771	0.143517117959228	0.048328193865999	0.135168379929467	0.690498533346987	0.761028403439030	0.201298730055663	0.026233064264756	0.561763168481537	0.153725918314639
V075	营东村委会	0.123539056146016	0.099065812850900	0.366666593333348	0.266666666666667	0.459148036632065	0.698870243955394	0.984361557916779	0.012265390981262	0.474402927184908	0.113253017859849	0.039947620679637	0.074495411471881	0.570618201255927	0.678105469288063	0.333333380952388	0.024466001247778	0.447429472987434	0.128233787357949
V076	营南村委会	0.011813857098906	0.242896184715000	0.381818105454561	0.333333333333333	0.000000000000000	0.745378646524221	0.903277925482051	0.000000000000000	0.070144761406752	0.115711656811378	0.041842562133391	0.098172319030262	0.797939745756437	0.612025626923755	0.298701341372919	0.026776419665266	0.443168503621350	0.129708233749764
V077	营南社区居委会	0.000000000000000	1.000000009300000	0.000000000000000	0.066666666666667	0.000000000000000	0.064282607418677	0.472799807457659	0.000000000000000	0.582320148641917	0.815516313640954	0.999999998256584	0.000000000000000	0.946286032472132	0.939512250596158	0.857142979591854	0.020026892009074	0.217645965702628	0.149607712406446
V078	营西村委会	0.170768401283515	0.244876825411000	0.339999932000014	0.433333333333333	0.960964297768092	0.594063995560308	0.896701457307048	0.000000000000000	0.262502185086768	0.136516980834501	0.123964102227256	0.075138572025918	0.623896973449018	0.352660682588488	0.259740296846016	0.062689324882966	0.577337763744902	0.245746746092423
V079	永安村委会	0.139794210565569	0.150865931965000	0.311111048888901	0.333333333333333	0.500000130246503	0.579652912433826	0.854300744001679	0.046376654138915	0.513784966657303	0.143771505910619	0.147188446297266	0.174109108936143	0.613939998596968	0.544873085753838	0.253968290249438	0.046750436504888	0.781058279343388	0.297248209995209
V080	俞胡村委会	0.087260372245335	0.149154890166000	0.266666613333344	0.500000000000000	0.750000195369756	0.632401913068821	0.963601201724508	0.000000000000000	0.644312729459428	0.088390471086376	0.072220916115490	0.076216714554637	0.575317720709658	0.531683079783949	0.200000028571433	0.044507883167161	0.723398881335278	0.654901202770089
V081	闸河村委会	0.086405383008353	0.150730989463000	0.279999944000011	0.600000000000000	0.459148036632065	0.893088664900658	0.897950649133344	0.000000000000000	0.684484443564915	0.113632312561439	0.051758969854878	0.102739193846153	0.155825612365647	0.878355879157921	0.207142886734698	0.083430021119092	0.729661508050085	0.342779315487126
V082	张余村委会	0.150683909689821	0.113679308947000	0.333333266666680	0.366666666666667	0.405639167895705	0.570456366214582	0.789141590887689	0.202970114684453	0.669119469439910	0.103305507279139	0.124170387542103	0.171792888126212	0.768755314112606	0.622309470387010	0.285714326530618	0.184941612305600	0.906557989330901	0.469397387449451
V083	长宁村委会	0.000000000000000	0.136913534282000	0.279999944000011	0.533333333333333	0.459148036632065	0.646359999123016	0.949004173652216	0.000000000000000	0.351093338974554	0.061237448839918	0.013890359751810	0.058519667022380	0.518809958513119	0.485340011976799	0.235294151260509	0.078896004505658	0.649858109520163	0.588531046752161
V084	志光村委会	0.107540008180309	0.060302801281800	0.999999800000042	0.033333333333333	0.000000000000000	0.720031441595360	0.815378047861800	0.006659773556506	0.519593585465093	0.112565219981595	0.128597141268947	0.144738008807381	0.808158167646592	0.588875670640339	1.000000142857162	0.101484130778750	0.706218342744602	0.445661282075641
V085	周邶墩村委会	0.039986040765424	0.177956159097000	0.263157842105274	0.766666666666667	0.685475475788854	0.837700886695206	0.808079167125854	0.158222468186847	0.623764259756295	0.174334713314234	0.093514114563435	0.164578594793356	0.731946071435150	0.903717274445962	0.210526345864666	0.029051320515291	0.718288726112565	0.268296249826124
V086	周巷村村委会	0.000000000000000	0.014249135079500	0.499999900000020	0.100000000000000	0.500000130246503	0.439361033535414	0.907390223927864	0.009239070367064	0.464211150469069	0.053891235042120	0.049463853457283	0.063665144340911	0.334029852404240	0.310880199681742	0.500000071428583	0.789086760879587	0.726773272935979	0.592807054828351
V087	周巷社区居委会	0.389818070203203	0.386884425350000	0.000000000000000	0.000000000000000	0.000000000000000	0.201534671226823	0.293253276164864	0.148915617441739	0.625140825281495	0.739412943392208	0.780255559602645	0.234978959179805	0.771567242887414	0.881766148194829	0.000000000000000	0.012984476385950	0.226530990540294	0.150463274634010
V088	砖场村委会	0.238552324866409	0.227239036805000	0.299999940000012	0.600000000000000	0.959148166878570	0.731842533143992	0.737829718299786	0.158317692252618	0.341834481760435	0.165400687770594	0.051162364718506	0.135912255502568	0.743711803987759	0.918461093560119	0.219780251177399	0.089330111124200	0.747973164929095	0.194278171309796
V089	子婴村委会	0.047458997378291	0.143984946997000	0.272727218181829	0.400000000000000	0.500000130246503	0.652013916729836	0.993818755815771	0.054283738000315	0.694329045045389	0.108640716521533	0.088494563984404	0.100925014319485	0.377372295060150	0.590389331361471	0.246753282003716	0.088853769470526	0.830586688125994	0.427568473255799

## Sheet: Aggregated_survey_data
Aggregated_survey_data — supplementary raw materials
Sample_village_ID	Village_name	Number_of_valid_responses	Q7_mean	Q8_mean	Q9_mean	Q10_mean	Q11_mean	Q12_mean	Q13_mean	Q14_mean	Q15_mean	Q16_mean	Q17_mean	Q18_mean	Q19_mean	Interpolation_status
S001	应龙村委会	10	3.9	3.4	3.9	4.1	1.4	1.4	3.5	3.9	1.5	2.8	3.8	2.6	4.6	sample village
S002	龙翔村委会	12	3.83333	2.08333	4.16667	4	1.25	2	3.91667	4.41667	1.16667	2.83333	3.58333	3.33333	3.91667	sample village
S003	周巷社区居委会	10	3.6	2.2	3.5	3.8	1.3	2.2	4.3	4.3	1.2	2.6	3.8	3	3.7	sample village
S004	营南村委会	12	3.5	2.5	3.75	3.66667	1.58333	2.16667	4.08333	4.5	1.58333	2.83333	3.58333	3.08333	4	sample village
S005	志光村委会	10	3.4	2.2	3.9	4.1	1.8	2.2	4.4	4.7	1.4	3	4.2	3.3	4.2	sample village
S006	陈甸村委会	10	3.2	2.3	4.1	4.5	2.2	2.2	4.4	4.8	2	3.5	3.8	3.2	4.2	sample village
S007	东湖村委会	12	3.83333	2.66667	4.25	4.25	1.75	2.16667	3.66667	4.08333	1.5	2.83333	4	3.66667	3.83333	sample village
S008	六安村委会	12	3.75	2.91667	4.08333	4.5	2.25	2.58333	4	4.08333	1.66667	3	4.08333	3.75	4.16667	sample village
S009	金塘社区居委会	15	3.86667	2.6	3.93333	4.2	2.2	2.33333	4.13333	4	2	3.13333	4.06667	3.8	4.4	sample village
S010	阳沟村委会	10	3.7	2.4	4.4	4.3	1.5	3	4.4	4.2	1.8	3.7	4.1	4.1	4.3	sample village
S011	薛北村委会	10	3.6	2.4	3.9	3.7	1.4	2.7	4.2	3.9	1.3	2.5	3.9	3.3	4.3	sample village
S012	伯勤村委会	12	3.91667	2.33333	4.5	4.41667	1.75	1.58333	3.91667	4	1.5	3.25	4.25	3.83333	4.08333	sample village
S013	闸河村委会	15	3.2	2.66667	4.13333	4.4	1.46667	2.2	4.33333	3.73333	1.8	2.93333	4.06667	3.46667	4.13333	sample village
S014	张余村委会	18	3.72222	2.5	4.22222	4.33333	1.66667	1.88889	3.77778	3.77778	1.5	2.77778	3.94444	3.33333	4.16667	sample village
S015	龙胜村委会	12	3.41667	2.58333	4.08333	4	1.83333	2.75	4.33333	4.41667	1.83333	3.16667	3.91667	3.58333	4.08333	sample village
S016	十里村委会	15	3.73333	2.33333	4.06667	4.13333	2	1.86667	4	4.26667	1.4	3.33333	3.26667	3.53333	4.13333	sample village
S017	三新村委会	12	3.66667	2.41667	4.25	3.75	2.08333	2.58333	4.16667	4.58333	1.75	3.66667	3.91667	3.33333	4.25	sample village
S018	勤王村委会	10	3.3	2.5	4.2	4.3	1.6	2.5	4.4	4.5	1.3	3.2	3.6	3.2	4.3	sample village
S019	管伙村委会	18	3.66667	2.83333	3.83333	4.05556	1.83333	1.94444	4.38889	4.27778	1.58824	3.5	3.77778	3.22222	3.88889	sample village
S020	太丰村委会	12	2.91667	2.5	4	4.25	1.58333	1.83333	4.08333	3.75	1.83333	3	4.16667	3.5	4.33333	sample village
S021	一平村委会	12	3.16667	1.41667	4.66667	3	1.33333	1.41667	4.25	4.66667	1.33333	2.66667	3.16667	3.5	2.5	sample village
S022	剑鸣村委会	12	3.91667	1.33333	4.66667	3.66667	1.16667	1.66667	4.66667	4.41667	1.25	3	3.16667	4	4.58333	sample village
S023	灯塔村委会	15	4.26667	1.33333	4.73333	4.46667	1.86667	2.2	4.46667	4.46667	1.26667	2.93333	3.33333	3.8	4.53333	sample village
S024	龙奔村委会	18	4.5	1.38889	4.38889	3.38889	1.33333	1.94444	4.22222	4.33333	1.33333	2.55556	3.38889	3.22222	3.38889	sample village
S025	金沟村委会	12	3.25	1.33333	4.75	3.25	1.41667	1.5	3.91667	3.83333	1.25	2.33333	3	3.16667	3.41667	sample village
S026	南丰村委会	12	3.58333	1.5	4.58333	3.41667	1.5	1.25	4.16667	4.58333	1.33333	2.58333	3.16667	3.41667	3.66667	sample village
S027	二沟社区居委会	12	3.91667	1.41667	4.58333	3.33333	1.41667	1.16667	4.08333	4.58333	1.33333	2.75	3.25	3.25	3.25	sample village
S028	潘阳村委会	12	3.33333	1.16667	4.58333	3.33333	1.58333	1.41667	4.08333	4.08333	1.5	2.5	3.5	3.75	3.16667	sample village
S029	大庵村委会	12	3.25	1.16667	4.58333	3.16667	1.41667	1.41667	4.33333	4.08333	1.58333	2.5	3.83333	4	3.33333	sample village
S030	一沟村委会	12	4.25	1.25	4.5	4.41667	1.25	1.75	4.16667	4.16667	1.33333	3.08333	3.5	4.25	4.16667	sample village
S031	腰圩村委会	12	3.25	1.33333	4.66667	4.16667	1.5	1.41667	4.5	4.16667	1.25	2.91667	3.58333	3.66667	3.5	sample village
S032	双庙村委会	12	4.41667	1.25	4.66667	4.25	1.5	1.58333	4.33333	4.5	1.33333	3.5	3.16667	3.66667	4.16667	sample village

[truncated: 11 more sheets: Anonymised_questionnaire, AHP_weights, Entropy_weights, Combined_weights, CCD_results, Kriging_validation, Global_Moran_summary, Moran_LISA_results, Regression_results, Kmeans_silhouette, Kmeans_village_types]
